# Supplementary material for: Functional Analysis of Human Hub Proteins and Their Interactors Involved in the Intrinsic Disorder-Enriched Interactions
Source: Int J Mol Sci. 2017 Dec 19;18(12):2761. doi: 10.3390/ijms18122761 (PMC5751360; doi:10.3390/ijms18122761)
Supplement: Supplementary file 1 [file ijms-18-02761-s001.xlsx]

## Sheet: Supplementary Table S1
Supplementary Table S1. List of 100 most disordered-enriched hubs in human. Proteins shown in red font are discussed in the article. The proteins are sorted by the disorder content.
UniProt ID	Disorder content (computed using consensus of IUPred and Espritz)	Number of disordered protein binding regions per unit of 1000 AA (computed with DisoRDPbind)	Degree (promiscuity)	All interactors (UniProt ID is followed by the disorder content of this interactor; AVG is the average disorder content of these interactors)	Interactors involved in disorder-enriched hub PPIs (UniProt ID is followed by the disorder content of this interactor; AVG is the average disorder content of these interactors)
Q9Y2W1	0.892147	8.37696	72	AVG=0.2946#O00422(0.2876)#P61981(0.0769)#P68400(0.0946)#Q15287(0.8361)#Q9Y3B4(0.136)#Q9UKV3(0.8523)#Q9UPE1(0.3386)#O43175(0.)#O43290(0.5362)#O43395(0.2914)#P84243(0.3676)#Q05519(0.6674)#Q06455(0.4884)#O75475(0.7208)#Q08211(0.1008)#Q00839(0.52)#O00213(0.4789)#P49336(0.278)#P49760(0.2846)#O94906(0.187)#Q6ZW49(0.2984)#P52272(0.2096)#Q86VP6(0.0431)#P33993(0.0348)#P35659(0.5573)#Q8WXA9(0.7402)#Q92542(…	AVG=0.8523#Q9UKV3(0.8523)
Q86VM9	0.890871	8.39454	40	AVG=0.3079#Q9Y2J2(0.4158)#Q9Y3B4(0.136)#P41223(0.2222)#O75475(0.7208)#Q00839(0.52)#Q7Z2W7(0.0118)#Q15287(0.8361)#Q5SSJ5(0.5787)#P33993(0.0348)#P38159(0.8696)#Q92542(0.0113)#Q92731(0.1)#Q6EMK4(0.208)#P54274(0.3781)#Q13618(0.056)#P55769(0.0625)#Q14694(0.3195)#Q15019(0.0886)#Q15393(0.0329)#Q15424(0.8842)#Q15428(0.6379)#Q15459(0.4792)#Q15554(0.5148)#Q16656(0.1352)#Q16763(0.3378)#Q9H4L7(0.23)#Q99459(0…	AVG=0.8769#P38159(0.8696)#Q15424(0.8842)
Q15424	0.884153	7.65027	65	AVG=0.3146#O14646(0.4275)#O15379(0.1005)#Q9UKV3(0.8523)#O75376(0.6955)#P49759(0.2624)#Q5S007(0.0123)#P33527(0.0464)#Q5VWX1(0.5358)#P38159(0.8696)#Q92542(0.0113)#Q92616(0.0105)#Q9BR76(0.1247)#Q13618(0.056)#P54819(0.1213)#O75925(0.1843)#O95870(0.0484)#P04637(0.4962)#P16871(0.0479)#P29692(0.3416)#P68400(0.0946)#Q12873(0.337)#Q92804(0.8784)#Q9GZQ8(0.064)#P58107(0.1124)#Q15717(0.0583)#Q16630(0.7368)#Q…	AVG=0.8682#Q9UKV3(0.8523)#P38159(0.8696)#Q92804(0.8784)#Q14151(0.8552)#Q8IYB3(0.8628)#Q86VM9(0.8909)
Q5JVS0	0.878935	9.68523	29	AVG=0.3788#Q06787(0.3845)#P51114(0.3784)#Q9UER7(0.6203)#Q70Z53(0.3873)#P38432(0.5122)#Q14011(0.6395)#P09104(0.0161)#P63244(0.0189)#Q99873(0.0637)#Q12873(0.337)#Q07021(0.117)#Q9UGU5(0.7188)#O60506(0.3531)#Q92993(0.3119)#P17252(0.0625)#P06748(0.517)#P04637(0.4962)#Q9Y6X2(0.2293)#O75807(0.8353)#P63173(0.2143)#Q16637(0.5374)#Q01130(0.6787)#Q13242(0.2851)#Q07955(0.4919)#P31483(0.1943)#Q9NS56(0.5742)#P…	AVG=0.8353#O75807(0.8353)
Q92804	0.878378	10.1351	54	AVG=0.2352#O00555(0.4076)#Q01844(0.8125)#O95166(0.0769)#Q7L5N1(0.0153)#Q86VP6(0.0431)#Q92731(0.1)#P35637(0.8346)#Q15149(0.1708)#Q92804(0.8784)#Q92831(0.1899)#Q92905(0.0269)#Q93034(0.0077)#Q13616(0.0541)#Q13617(0.0322)#Q13618(0.056)#Q13619(0.0474)#Q13620(0.1446)#Q14012(0.0811)#P60520(0.0342)#Q15843(0.284)#Q16531(0.0035)#Q16777(0.2713)#Q9GZQ8(0.064)#Q96GG9(0.0541)#Q9H0R8(0.0598)#Q9H492(0.1157)#Q994…	AVG=0.8657#P35637(0.8346)#Q92804(0.8784)#Q15424(0.8842)
P60896	0.871429	14.2857	42	AVG=0.1153#O43809(0.0573)#P38398(0.4332)#O95817(0.8609)#P51587(0.081)#Q9NVR2(0.0521)#Q5TA45(0.0233)#Q6P9B9(0.0981)#Q96HW7(0.0208)#Q9UL03(0.1905)#Q9H0H0(0.0291)#Q9NVH2(0.0301)#Q75QN2(0.0342)#Q9NV88(0.0426)#Q96PV6(0.5674)#Q9GZQ8(0.064)#Q5JVF3(0.0125)#P62333(0.0411)#P62191(0.1841)#P17980(0.0342)#P43686(0.012)#P62195(0.0714)#P35998(0.0531)#P25787(0.0214)#P60900(0.0244)#O14818(0.0927)#P20618(0.0622)#P…	AVG=0.8609#O95817(0.8609)
P38159	0.869565	0	82	AVG=0.3198#P38919(0.0389)#Q9UQL6(0.4216)#O43143(0.166)#O60674(0.0115)#Q07666(0.6027)#O75525(0.4769)#P51116(0.4591)#P51858(0.7583)#Q7L2J0(0.5486)#Q86VP6(0.0431)#P35222(0.1793)#Q8N5R6(0.2683)#Q8TBB1(0.1648)#O43390(0.3807)#P16871(0.0479)#P68400(0.0946)#Q16236(0.3058)#Q96PK6(0.2392)#Q9BTL3(0.9068)#Q9H1E3(1.)#Q9UBU9(0.2359)#Q9UKM9(0.3791)#Q9Y3B4(0.136)#Q92530(0.3284)#Q9BUJ2(0.5386)#Q13618(0.056)#Q1410…	AVG=0.8758#Q9BTL3(0.9068)#P35637(0.8346)#Q15424(0.8842)#Q8IYB3(0.8628)#Q86VM9(0.8909)
Q92934	0.863095	11.9048	40	AVG=0.2299#O43521(0.4242)#Q16548(0.)#Q92843(0.0415)#P10398(0.2706)#P61981(0.0769)#Q04917(0.0732)#P31946(0.1382)#P62258(0.102)#P27348(0.0408)#P31947(0.1613)#P31749(0.1375)#P63104(0.0776)#Q07817(0.2146)#Q07812(0.1562)#P10415(0.2469)#O60238(0.5799)#P15056(0.2794)#P38936(0.6341)#Q68CJ9(0.4534)#Q01844(0.8125)#P62993(0.)#P17612(0.0513)#Q14145(0.0144)#P41743(0.1107)#Q15418(0.0844)#O75582(0.1085)#Q07820(…	AVG=0.8125#Q01844(0.8125)
Q8IYB3	0.862832	5.53097	125	AVG=0.3685#Q9Y2J2(0.4158)#O43719(0.6543)#O43791(0.0535)#P49756(0.6667)#Q86VP6(0.0431)#P34947(0.1017)#O00422(0.2876)#O14686(0.7022)#O14786(0.0477)#O15372(0.2557)#O43395(0.2914)#O43660(0.2023)#O60231(0.2219)#O75175(0.5405)#O75400(0.4201)#O75937(0.4308)#O94913(0.6334)#P02545(0.3223)#P08579(0.2489)#P09234(0.5094)#P09661(0.2706)#P17844(0.1515)#P23246(0.7355)#P26599(0.1186)#P26998(0.1137)#P31689(0.1385…	AVG=0.8473#P35637(0.8346)#P38159(0.8696)#Q15287(0.8361)#Q15424(0.8842)#Q9NYF8(0.8424)#Q9UKV3(0.8523)#P16989(0.8118)
O95817	0.86087	17.3913	415	AVG=0.1865#Q99933(0.4957)#Q96AP0(0.4301)#P63104(0.0776)#Q9NT62(0.1178)#P46952(0.0315)#P05141(0.)#O15144(0.0367)#O43521(0.4242)#O95817(0.8609)#O95352(0.0299)#O95154(0.0302)#O95394(0.0129)#P04424(0.0129)#O95831(0.1175)#P04083(0.0491)#P05549(0.4188)#P07355(0.)#P08758(0.0156)#P09972(0.0522)#P17516(0.0124)#P43353(0.0107)#P27348(0.0408)#P31946(0.1382)#P62258(0.102)#P50995(0.3644)#P54252(0.283)#P53396(0…	AVG=0.8505#O95817(0.8609)#Q9NYF8(0.8424)#P60896(0.8714)#Q9H098(0.8855)#P53539(0.8166)#P33241(0.8555)#P18827(0.8194)#P16949(0.8523)
P46527	0.858586	40.404	78	AVG=0.1607#P38936(0.6341)#P30279(0.09)#P61981(0.0769)#P78396(0.0108)#Q15078(0.2378)#Q00534(0.0675)#P62258(0.102)#P63104(0.0776)#P00519(0.4416)#P27348(0.0408)#P14635(0.2679)#P31749(0.1375)#P31946(0.1382)#O96020(0.1535)#Q00526(0.0131)#P06493(0.)#P24385(0.1288)#Q00535(0.)#P20248(0.2731)#P30281(0.137)#P11802(0.0792)#P24864(0.1683)#P24941(0.0336)#P61024(0.1772)#Q92905(0.0269)#Q13616(0.0541)#Q13619(0.0…	AVG=0.8464#Q02539(0.8419)#P16401(0.8451)#P16949(0.8523)
Q14151	0.855194	9.44386	34	AVG=0.3314#O15379(0.1005)#O75376(0.6955)#Q5S007(0.0123)#Q86VP6(0.0431)#P35637(0.8346)#Q92905(0.0269)#Q13618(0.056)#O95166(0.0769)#P03372(0.1681)#P04637(0.4962)#P60520(0.0342)#Q14161(0.3584)#Q9BXW4(0.1224)#Q9GZQ8(0.064)#Q9H0R8(0.0598)#Q13123(0.6463)#Q16656(0.1352)#P62993(0.)#Q14151(0.8552)#Q9H492(0.1157)#P49354(0.1768)#P02647(0.03)#Q8TDY2(0.0928)#Q15424(0.8842)#P05060(0.7725)#Q6ZRS2(0.6214)#Q96SB4…	AVG=0.858#P35637(0.8346)#Q14151(0.8552)#Q15424(0.8842)
Q9UKV3	0.852349	13.4228	74	AVG=0.2599#Q9NUQ8(0.0691)#P31946(0.1382)#P61981(0.0769)#P42330(0.0372)#O60641(0.5182)#Q9BZZ5(0.1622)#Q9UH62(0.1398)#Q04656(0.0273)#O75531(0.1236)#O15155(0.0678)#Q14137(0.1796)#Q9BSF8(0.3747)#Q03135(0.0449)#Q8TDX6(0.1297)#P49760(0.2846)#P68400(0.0946)#Q13618(0.056)#Q92841(0.3567)#O43143(0.166)#Q08211(0.1008)#Q6IAN0(0.04)#Q9Y2J2(0.4158)#Q15717(0.0583)#Q92817(0.1549)#Q9BYC5(0.0122)#P34947(0.1017)#Q9…	AVG=0.8688#Q15287(0.8361)#Q15424(0.8842)#Q8IYB3(0.8628)#Q9Y2W1(0.8921)
P16949	0.852349	6.71141	25	AVG=0.2027#P43220(0.0086)#O43865(0.1698)#P49821(0.0259)#P31948(0.1823)#Q15019(0.0886)#Q96FQ6(0.0971)#Q96IR7(0.0189)#Q4G0N4(0.0882)#Q504Q3(0.0191)#P02751(0.1358)#O95817(0.8609)#P24941(0.0336)#P11142(0.0898)#P37231(0.0554)#P13612(0.0165)#P30480(0.1381)#Q96BK5(0.7927)#P46527(0.8586)#P55072(0.1079)#P07951(0.3979)#Q9UL62(0.0719)#P0CG48(0.)#Q9NRR5(0.4293)#P19320(0.0108)#P40337(0.3709)	AVG=0.8597#O95817(0.8609)#P46527(0.8586)
P16401	0.845133	22.1239	36	AVG=0.205#P38936(0.6341)#Q03111(0.6064)#P46527(0.8586)#Q00535(0.)#O76075(0.0562)#Q9BZS1(0.1995)#O95503(0.5631)#Q6ZMK1(0.0193)#Q93034(0.0077)#P14635(0.2679)#P45973(0.5812)#P20248(0.2731)#P02751(0.1358)#P78396(0.0108)#P24864(0.1683)#P06493(0.)#P24941(0.0336)#P84243(0.3676)#Q9NWZ3(0.0696)#P13612(0.0165)#Q92830(0.1732)#Q92831(0.1899)#P17252(0.0625)#P05771(0.1133)#Q05513(0.0693)#Q05655(0.0251)#Q9P289(…	AVG=0.8586#P46527(0.8586)
O95467	0.844898	4.08163	33	AVG=0.1762#O75746(0.031)#P30443(0.1973)#P30450(0.1151)#P34998(0.0293)#P59768(0.1268)#P62158(0.1141)#P62873(0.)#P01892(0.1041)#O95467(0.8449)#P04439(0.1425)#P34897(0.0655)#Q16658(0.0426)#P07550(0.1864)#P50148(0.0111)#Q6IAA8(0.2919)#Q00987(0.4929)#Q02818(0.3796)#P80303(0.2357)#Q96CV9(0.3588)#P35558(0.0129)#P43119(0.1736)#P22234(0.0094)#P41220(0.3081)#Q9NPQ8(0.2034)#Q9Y265(0.0614)#Q9Y5W8(0.0579)#P63…	AVG=0.8449#O95467(0.8449)
Q9NYF8	0.842391	13.0435	40	AVG=0.2452#Q99728(0.2239)#P61981(0.0769)#O95817(0.8609)#P49407(0.1818)#P32121(0.1296)#P10415(0.2469)#Q86VP6(0.0431)#Q92851(0.1382)#Q9HC52(0.5373)#Q99459(0.303)#O14646(0.4275)#P49761(0.4044)#P49760(0.2846)#P49759(0.2624)#P68400(0.0946)#Q13618(0.056)#P00533(0.0851)#P50402(0.3228)#P03372(0.1681)#Q92731(0.1)#P62993(0.)#P34947(0.1017)#Q96DB2(0.0605)#P38919(0.0389)#Q05655(0.0251)#P33993(0.0348)#P61326(…	AVG=0.8533#O95817(0.8609)#Q15287(0.8361)#Q8IYB3(0.8628)
Q02539	0.84186	32.5581	57	AVG=0.2206#Q9UBC3(0.3529)#O75530(0.1587)#P35659(0.5573)#P54922(0.0308)#Q15910(0.248)#Q6ZN18(0.5764)#P46527(0.8586)#Q00534(0.0675)#O76075(0.0562)#Q09472(0.5829)#P50613(0.0491)#Q8TEK3(0.5083)#P60033(0.)#P02741(0.0179)#O95503(0.5631)#P12544(0.)#P30279(0.09)#P32121(0.1296)#O96020(0.1535)#Q8NI51(0.2127)#P11802(0.0792)#P78396(0.0108)#P14635(0.2679)#P20248(0.2731)#P06493(0.)#P24864(0.1683)#P24941(0.0336…	AVG=0.8586#P46527(0.8586)
Q15287	0.836066	6.55738	147	AVG=0.342#A0JLT2(0.627)#O14641(0.4946)#Q9Y2J2(0.4158)#Q9UJV9(0.1849)#Q9UMS4(0.0238)#Q9UKM9(0.3791)#Q9UKJ3(0.7463)#O43172(0.1092)#P84090(0.125)#O43464(0.0917)#O43809(0.0573)#O60925(0.0656)#Q00839(0.52)#Q02040(0.4417)#O94906(0.187)#Q6VN20(0.3613)#P52272(0.2096)#Q86VP6(0.0431)#Q8N5F7(0.788)#Q8NAV1(0.4551)#Q8TEQ6(0.1141)#Q92620(0.3651)#Q92905(0.0269)#Q9BQG0(0.2628)#Q13427(0.7825)#Q13526(0.4172)#Q9BU7…	AVG=0.8681#Q9NYF8(0.8424)#Q9UKV3(0.8523)#Q8IYB3(0.8628)#Q9Y2W1(0.8921)#Q86VM9(0.8909)
P35637	0.834601	11.4068	110	AVG=0.3018#O00418(0.2497)#O75815(0.2424)#P50750(0.0941)#Q7L5N1(0.0153)#P30480(0.1381)#Q86VP6(0.0431)#P35222(0.1793)#Q01844(0.8125)#Q8N1W1(0.268)#Q99873(0.0637)#Q8WYQ5(0.295)#Q92905(0.0269)#Q93034(0.0077)#Q13616(0.0541)#Q13617(0.0322)#Q13618(0.056)#Q13619(0.0474)#Q13620(0.1446)#Q14204(0.0189)#Q99459(0.303)#Q96GG9(0.0541)#P68104(0.0736)#P0C7T5(0.4514)#P35637(0.8346)#O60739(0.1593)#P02751(0.1358)#P0…	AVG=0.8496#Q01844(0.8125)#P35637(0.8346)#P15884(0.8306)#Q969F2(0.9002)#P38159(0.8696)#Q92804(0.8784)#Q14151(0.8552)#Q8IYB3(0.8628)#P67809(0.8025)
P35638	0.83432	23.6686	55	AVG=0.3168#Q9UBW8(0.2036)#O14867(0.2133)#O43889(0.0684)#P15336(0.5366)#P18848(0.4245)#P53567(0.74)#P68400(0.0946)#Q00534(0.0675)#Q13616(0.0541)#Q13618(0.056)#Q16520(0.6)#Q8N1L9(0.5182)#Q96BA8(0.3699)#Q99627(0.)#Q9BYV9(0.3306)#Q9NR55(0.6299)#P18847(0.1934)#P17676(0.5855)#Q15744(0.395)#Q86SX3(0.1414)#P35638(0.8343)#Q10586(0.7569)#Q9BPX1(0.1)#Q99814(0.2632)#Q09472(0.5829)#P15407(0.8967)#P01100(0.313…	AVG=0.8655#P35638(0.8343)#P15407(0.8967)
P15884	0.830585	8.9955	41	AVG=0.3483#O00512(0.9341)#Q02363(0.3284)#P35637(0.8346)#Q13363(0.1)#P62158(0.1141)#P15884(0.8306)#O60381(0.2218)#P04626(0.1849)#Q02535(0.2101)#P41134(0.0903)#Q9NQ33(0.1)#Q96AC1(0.0485)#P10275(0.3569)#Q14526(0.3042)#Q9UER7(0.6203)#Q6P1J9(0.1883)#P50553(0.5636)#Q09472(0.5829)#P35222(0.1793)#P12980(0.5786)#O00255(0.2325)#O60682(0.5631)#P15172(0.5562)#P22736(0.3344)#Q8N2W9(0.2059)#P29590(0.2528)#Q8WV…	AVG=0.8326#P35637(0.8346)#P15884(0.8306)
P54259	0.826891	8.40336	98	AVG=0.2927#O00468(0.1297)#Q9Y4B4(0.3279)#Q08117(0.2589)#Q9NP73(0.2401)#P61204(0.)#P54259(0.8269)#P46379(0.5707)#Q9UQB8(0.317)#Q02641(0.4883)#Q9HC77(0.429)#Q9H2X0(0.1414)#P52943(0.2019)#Q9UQB3(0.4539)#Q09013(0.1033)#O14640(0.4849)#O14641(0.4946)#Q16610(0.35)#Q9BSW2(0.1899)#Q01844(0.8125)#P23142(0.0085)#P98095(0.2466)#Q12805(0.0751)#O95967(0.0587)#Q9UBX5(0.0089)#P04406(0.0269)#Q96CN9(0.2619)#P28799…	AVG=0.8338#P54259(0.8269)#Q01844(0.8125)#Q3KQU3(0.8621)
P10636	0.824538	11.8734	72	AVG=0.1991#Q9UQM7(0.0774)#O15264(0.0986)#O15294(0.0182)#O15428(0.9)#Q9Y5A7(0.1577)#P43405(0.1024)#P45983(0.2084)#P48059(0.0246)#O75582(0.1085)#P48729(0.1128)#Q09472(0.5829)#P48730(0.2867)#P49768(0.2827)#P37840(0.3429)#P31749(0.1375)#P31946(0.1382)#Q13501(0.4523)#Q14289(0.112)#Q15257(0.0782)#Q15418(0.0844)#P53041(0.0802)#Q15759(0.1511)#Q16512(0.2166)#Q16656(0.1352)#P61764(0.0488)#P62158(0.1141)#Q9…	AVG=0.8623#O15428(0.9)#P10636(0.8245)
P16403	0.821596	18.7793	80	AVG=0.1862#Q00535(0.)#P49450(0.3857)#P49841(0.219)#O95166(0.0769)#Q86VP6(0.0431)#Q8TEK3(0.5083)#Q92731(0.1)#Q92905(0.0269)#Q93034(0.0077)#Q13616(0.0541)#Q13617(0.0322)#Q13618(0.056)#Q13620(0.1446)#P60033(0.)#P60520(0.0342)#Q9H0R8(0.0598)#P19784(0.04)#P00742(0.0635)#O75530(0.1587)#Q6ZN18(0.5764)#P27348(0.0408)#P11802(0.0792)#P35222(0.1793)#Q8IXJ9(0.636)#P49407(0.1818)#P32121(0.1296)#P63104(0.0776)…	AVG=0.8025#P67809(0.8025)
O60885	0.817181	11.0132	43	AVG=0.2798#P51825(0.7901)#P62258(0.102)#P63104(0.0776)#O60583(0.5329)#O60563(0.5152)#Q99459(0.303)#P49336(0.278)#P50750(0.0941)#Q9BPX7(0.0998)#Q9H7E9(0.5022)#Q96EP1(0.3976)#O95832(0.0806)#P46108(0.2599)#Q15717(0.0583)#Q03111(0.6064)#Q09472(0.5829)#P62993(0.)#P68431(0.3676)#Q71DI3(0.3676)#P62805(0.1942)#O94992(0.805)#Q6NYC1(0.2134)#Q9H7Z6(0.1812)#Q9UGL1(0.1464)#Q93074(0.2963)#O60244(0.1809)#Q9NVC6…	AVG=0.805#O94992(0.805)
Q01844	0.8125	12.1951	227	AVG=0.2728#O00418(0.2497)#Q9UEE9(0.709)#Q9Y478(0.1963)#P43005(0.0344)#O60238(0.5799)#Q06187(0.0926)#O60739(0.1593)#A0AVK6(0.3183)#O00273(0.136)#O95336(0.0388)#O95400(0.566)#P01019(0.0351)#O96019(0.0256)#P11597(0.)#P16860(0.4776)#P26378(0.1974)#P54259(0.8269)#P62158(0.1141)#P78310(0.2329)#Q0VDD7(0.8847)#Q14576(0.0954)#Q16630(0.7368)#Q6PJW8(0.4855)#Q7Z6B0(0.0952)#Q8N6Q3(0.0412)#Q8N684(0.5987)#Q8N65…	AVG=0.8409#P54259(0.8269)#Q0VDD7(0.8847)#Q92934(0.8631)#Q01844(0.8125)#P35637(0.8346)#Q9HC44(0.8249)#Q92804(0.8784)#P67809(0.8025)
P16989	0.811828	18.8172	63	AVG=0.1994#Q9UPN3(0.0981)#O60260(0.0989)#O60841(0.5066)#Q07021(0.117)#Q08211(0.1008)#P49770(0.1538)#O95166(0.0769)#Q6ZW49(0.2984)#Q7L2J0(0.5486)#Q86VP6(0.0431)#Q8IYB3(0.8628)#Q8TEK3(0.5083)#Q92499(0.027)#Q92905(0.0269)#Q93034(0.0077)#Q969P0(0.0473)#Q13148(0.2778)#Q13573(0.5504)#Q13616(0.0541)#Q13617(0.0322)#Q13618(0.056)#Q13620(0.1446)#Q14684(0.5237)#Q15717(0.0583)#P60520(0.0342)#Q15843(0.284)#Q9…	AVG=0.8647#Q8IYB3(0.8628)#Q14244(0.8665)
O94992	0.805014	16.7131	27	AVG=0.3217#O60583(0.5329)#O94992(0.805)#P00533(0.0851)#P51825(0.7901)#Q08211(0.1008)#Q13547(0.2386)#Q14192(0.)#Q9BXS5(0.0236)#Q9H6Z9(0.0293)#Q92499(0.027)#Q14204(0.0189)#P03372(0.1681)#P10809(0.0192)#O60885(0.8172)#O60563(0.5152)#P50750(0.0941)#Q96MH2(0.7797)#Q16665(0.3039)#Q4G0J3(0.4519)#Q00987(0.4929)#Q7L2J0(0.5486)#Q16656(0.1352)#P04637(0.4962)#Q15554(0.5148)#P54274(0.3781)#Q04206(0.3194)#P0CG…	AVG=0.8111#O94992(0.805)#O60885(0.8172)
P67809	0.802469	18.5185	135	AVG=0.2356#O00567(0.2609)#O15205(0.0242)#O15355(0.4744)#Q9UKV8(0.0722)#Q9UQ35(0.927)#P43686(0.012)#Q04837(0.0405)#O60216(0.3708)#O60506(0.3531)#O75400(0.4201)#P48200(0.0042)#O75643(0.0449)#O75955(0.0164)#P48729(0.1128)#Q09472(0.5829)#Q00839(0.52)#P49257(0.1137)#O00213(0.4789)#P49721(0.0299)#P50750(0.0941)#Q01860(0.3583)#O95166(0.0769)#P51812(0.0757)#Q6Y7W6(0.6474)#Q6ZW49(0.2984)#Q7L2J0(0.5486)#Q7…	AVG=0.8369#P35637(0.8346)#Q01844(0.8125)#Q5JVS0(0.8789)#P16403(0.8216)
Q14686	0.799806	18.9045	77	AVG=0.2921#O15550(0.3362)#Q9UPY3(0.0687)#Q9UMN6(0.6247)#O43504(0.1099)#Q92731(0.1)#Q99929(0.7254)#Q9C005(0.3939)#P55345(0.06)#P01100(0.3132)#P05412(0.2266)#P09769(0.0227)#P10275(0.3569)#P10912(0.2053)#P49715(0.6564)#P51610(0.255)#P60709(0.)#Q15648(0.6211)#Q15788(0.499)#Q71DI3(0.3676)#Q8N9N2(0.0475)#Q9ULK4(0.0219)#Q9Y3R0(0.1817)#Q9Y613(0.3797)#P20749(0.3502)#Q9UBL3(0.3455)#Q09472(0.5829)#Q00613(0.…	AVG=0.7998#Q14686(0.7998)
Q96BK5	0.792683	12.1951	96	AVG=0.2205#Q9UHV9(0.3831)#O60888(0.1117)#Q06546(0.0661)#P99999(0.1714)#P47813(0.3958)#P50502(0.4553)#Q6ZRQ5(0.0137)#P30086(0.0856)#P33316(0.3532)#Q8NE71(0.374)#Q9BQ39(0.2836)#Q13310(0.1553)#P20290(0.4709)#P14174(0.)#P11940(0.1714)#P60660(0.0397)#P25189(0.2218)#P58107(0.1124)#P62807(0.3254)#P60981(0.0303)#P62158(0.1141)#P68402(0.1266)#Q15369(0.1071)#Q86YZ3(0.9614)#Q99417(0.2524)#Q9BZE4(0.2524)#Q9H…	AVG=0.8523#P16949(0.8523)
Q9H307	0.79219	8.3682	43	AVG=0.3544#Q9UBC1(0.5591)#A0JLT2(0.627)#Q9Y2J2(0.4158)#O15530(0.1511)#P34947(0.1017)#Q15004(1.)#Q99728(0.2239)#P01100(0.3132)#Q9NP64(0.4025)#Q99459(0.303)#P19784(0.04)#Q13363(0.1)#P08727(0.05)#P05783(0.0163)#P05787(0.1429)#P63104(0.0776)#P38919(0.0389)#P49760(0.2846)#P61326(0.)#P68400(0.0946)#Q96DB2(0.0605)#P61981(0.0769)#Q8TF01(0.9503)#Q13427(0.7825)#Q13523(0.5631)#Q14498(0.2774)#Q15287(0.8361)#…	AVG=0.8494#Q15287(0.8361)#Q8IYB3(0.8628)
O00165	0.792115	17.9211	50	AVG=0.1738#Q9UKV5(0.2644)#Q01844(0.8125)#O00303(0.2409)#O15371(0.1168)#O43572(0.2145)#P06576(0.0302)#P11021(0.0795)#P38646(0.0898)#Q16760(0.1614)#Q9NPI6(0.421)#Q13618(0.056)#Q13619(0.0474)#Q9NR20(0.275)#P13569(0.0318)#P42858(0.1636)#Q86Z02(0.1909)#Q14541(0.1691)#P08238(0.1409)#O43464(0.0917)#P01583(0.0295)#Q13418(0.0332)#Q99759(0.3275)#O95460(0.008)#P53779(0.153)#P58340(0.5224)#O15439(0.0513)#Q96…	AVG=0.8125#Q01844(0.8125)
P51825	0.790083	8.26446	27	AVG=0.4251#P21589(0.007)#P42568(0.6514)#P55197(0.6067)#P51825(0.7901)#Q9UHB7(0.8091)#O60885(0.8172)#Q86X55(0.0625)#O60563(0.5152)#P50750(0.0941)#P26196(0.1677)#Q8TEK3(0.5083)#Q96JC9(0.6866)#O00472(0.4516)#Q03111(0.6064)#Q16695(0.3676)#O94992(0.805)#Q03164(0.6442)#O95402(0.6833)#P29120(0.158)#P06748(0.517)#Q96L73(0.4607)#P24928(0.2746)#Q8IUQ4(0.0887)#O43255(0.1852)#O15198(0.2013)#Q04206(0.3194)#P0…	AVG=0.8104#Q9UHB7(0.8091)#O60885(0.8172)#O94992(0.805)
P02452	0.784153	15.7104	34	AVG=0.1787#P38398(0.4332)#Q99622(0.1429)#Q99728(0.2239)#P02452(0.7842)#P04083(0.0491)#P22303(0.0472)#P07384(0.007)#Q9NQ11(0.0695)#P08123(0.8141)#Q02388(0.5791)#P25067(0.7312)#O43405(0.06)#Q08345(0.1577)#Q15717(0.0583)#P17936(0.2337)#P17301(0.0144)#P05556(0.0476)#P28300(0.3213)#P20916(0.0543)#O00339(0.0722)#P08253(0.0061)#P14543(0.0529)#Q14112(0.1513)#P04085(0.1754)#P01127(0.2573)#P98161(0.062)#P5…	AVG=0.8141#P08123(0.8141)
Q13227	0.779817	3.0581	30	AVG=0.2696#Q9UJU6(0.4442)#Q08379(0.3832)#Q0VDD7(0.8847)#Q09472(0.5829)#Q12873(0.337)#Q99459(0.303)#P18848(0.4245)#P78396(0.0108)#Q13547(0.2386)#Q9UQL6(0.4216)#O15379(0.1005)#P41235(0.1519)#P57077(0.0909)#O15457(0.1464)#O43196(0.054)#O75376(0.6955)#Q9Y618(0.705)#Q15466(0.0739)#Q96RI1(0.0226)#O00482(0.1146)#P04637(0.4962)#Q15047(0.3904)#Q96ST3(0.2451)#Q96EA4(0.1041)#O60907(0.1127)#Q9BZK7(0.0817)#P1…	AVG=0.8847#Q0VDD7(0.8847)
Q8NHZ8	0.776471	23.5294	27	AVG=0.2553#Q9UJX4(0.0252)#Q9UJX5(0.0594)#O43684(0.0976)#P14635(0.2679)#P30260(0.2476)#Q12834(0.2585)#Q9UJX2(0.0536)#P60006(0.8843)#O95996(0.5979)#P12830(0.1247)#Q9BS18(0.5946)#Q9H1A4(0.0808)#Q96DE5(0.3273)#O60566(0.2076)#Q9UJX3(0.1336)#Q9UM13(0.1135)#Q9UJX6(0.1144)#Q13042(0.0758)#Q9UKT4(0.1163)#Q9UM11(0.2661)#P01106(0.4442)#P51955(0.1124)#Q9UPP1(0.3962)#O95997(0.4158)#P48431(0.5047)#P51668(0.1497…	AVG=0.8843#P60006(0.8843)
P05060	0.772526	10.3397	35	AVG=0.2309#O15527(0.1333)#O60260(0.0989)#Q13724(0.0621)#Q13951(0.1978)#Q14151(0.8552)#P60484(0.129)#Q16513(0.1321)#P61224(0.0489)#Q99685(0.0858)#Q13085(0.0081)#Q38SD2(0.064)#Q99700(0.7822)#Q53HC0(0.4109)#P04183(0.0684)#P05067(0.2039)#P05109(0.129)#P12236(0.0134)#P15153(0.)#P19388(0.1048)#P22607(0.1117)#P27448(0.4077)#P28340(0.1048)#P48443(0.1577)#P38936(0.6341)#P18754(0.0855)#P20073(0.3053)#Q5S00…	AVG=0.8438#Q14151(0.8552)#P49750(0.8324)
P51858	0.758333	4.16667	172	AVG=0.276#P50402(0.3228)#O14744(0.0345)#O43684(0.0976)#O75367(0.2016)#O96019(0.0256)#P07305(0.7784)#P13639(0.0047)#P19525(0.1488)#P29372(0.2886)#P31689(0.1385)#P35659(0.5573)#P38646(0.0898)#Q07065(0.2741)#Q13185(0.5519)#Q16778(0.3651)#Q99714(0.0153)#Q9P0M6(0.2285)#Q9UIG0(0.3082)#Q9Y295(0.0327)#P68431(0.3676)#P06493(0.)#O60814(0.3254)#O43143(0.166)#O00178(0.2167)#P05141(0.)#P22087(0.324)#P16402(0.…	AVG=0.8477#P16402(0.8733)#P10412(0.8265)#P16403(0.8216)#P38159(0.8696)
Q9NVW2	0.75641	11.2179	29	AVG=0.2873#Q9UBR4(0.5693)#O75177(0.8636)#O00151(0.2644)#Q86U70(0.3212)#Q8N448(0.2072)#Q92769(0.252)#P25791(0.1076)#Q8N1G1(0.5962)#Q9NVW2(0.7564)#P03372(0.1681)#O43679(0.3753)#P62263(0.298)#Q8IUQ4(0.0887)#Q96ST3(0.2451)#Q9HAU4(0.119)#Q15036(0.1553)#P42226(0.2161)#P54274(0.3781)#P21580(0.2114)#Q9H0E2(0.073)#Q9Y2X8(0.1088)#P62837(0.0408)#P51668(0.1497)#P61077(0.102)#Q96LR5(0.3731)#P51965(0.3264)#P0C…	AVG=0.8636#O75177(0.8636)
Q14157	0.74793	16.5593	35	AVG=0.2749#P40692(0.1812)#P46934(0.2616)#O75051(0.0053)#O75533(0.2799)#P48634(0.9476)#Q5T6F2(0.6622)#Q8IXQ9(0.)#Q8N684(0.5987)#Q92905(0.0269)#Q969T4(0.4155)#Q13418(0.0332)#P54253(0.4957)#P54277(0.0547)#Q13618(0.056)#Q15717(0.0583)#Q16630(0.7368)#Q96J02(0.2049)#P62256(0.2787)#Q13131(0.1181)#Q96RN5(0.4162)#P02751(0.1358)#O95817(0.8609)#P05161(0.0606)#P24752(0.)#P13612(0.0165)#Q9UBE8(0.2676)#P03372(…	AVG=0.8609#O95817(0.8609)
Q14676	0.743418	14.3609	176	AVG=0.2398#O15392(0.1972)#Q9UJX3(0.1336)#P42574(0.0758)#O75531(0.1236)#Q09472(0.5829)#Q8NEM0(0.3102)#Q9BQA5(0.2244)#Q13042(0.0758)#O14579(0.0455)#O75369(0.0453)#O95639(0.2602)#O95714(0.0728)#P06733(0.0161)#P07910(0.5882)#P14635(0.2679)#P16615(0.0067)#P20248(0.2731)#P21333(0.065)#P28288(0.0288)#P29372(0.2886)#P43694(0.4819)#P46013(0.8127)#P46736(0.0222)#P47756(0.0469)#P50402(0.3228)#P52907(0.1049)…	AVG=0.8921#Q9Y2W1(0.8921)
Q8WXA9	0.740157	3.93701	60	AVG=0.4126#Q00987(0.4929)#O00571(0.2885)#O60812(0.5631)#P06748(0.517)#P07910(0.5882)#P09651(0.4785)#P09874(0.0868)#P11940(0.1714)#P19338(0.5944)#P22626(0.4646)#P23246(0.7355)#P31943(0.1091)#P51991(0.4233)#P61978(0.2549)#P62314(0.2689)#P62318(0.246)#P63244(0.0189)#P67870(0.0837)#P98175(0.6247)#Q00839(0.52)#Q07021(0.117)#Q12874(0.2076)#Q13310(0.1553)#Q13838(0.0794)#Q14103(0.3775)#Q15287(0.8361)#Q15…	AVG=0.882#P38159(0.8696)#Q15424(0.8842)#Q9Y2W1(0.8921)
Q16630	0.736842	5.44465	66	AVG=0.2906#O00213(0.4789)#Q86VP6(0.0431)#Q92793(0.6274)#Q92989(0.0753)#P60033(0.)#Q8N684(0.5987)#Q9H6L4(0.1111)#Q99728(0.2239)#O43809(0.0573)#P30480(0.1381)#P68400(0.0946)#P33240(0.5598)#Q13618(0.056)#P98082(0.5558)#Q92731(0.1)#Q01844(0.8125)#P02751(0.1358)#O95166(0.0769)#P60520(0.0342)#Q9H0R8(0.0598)#Q9NXP7(0.023)#P61978(0.2549)#Q14164(0.0475)#Q96J02(0.2049)#Q9NZM3(0.1538)#P48729(0.1128)#Q53G59(…	AVG=0.8842#Q15424(0.8842)
P23246	0.735502	12.7298	127	AVG=0.2947#Q9UQL6(0.4216)#Q9UBK2(0.5439)#Q9UK76(1.)#P43354(0.2375)#O43390(0.3807)#O43719(0.6543)#O60216(0.3708)#O60260(0.0989)#O75364(0.3046)#O75400(0.4201)#P49715(0.6564)#O95166(0.0769)#P52272(0.2096)#Q7RTV0(0.0455)#P35637(0.8346)#Q92905(0.0269)#Q13526(0.4172)#Q96CW1(0.0391)#Q14192(0.)#Q15393(0.0329)#Q15459(0.4792)#Q15717(0.0583)#P60033(0.)#P60520(0.0342)#Q9GZQ8(0.064)#Q9H0R8(0.0598)#Q9H492(0.11…	AVG=0.8775#Q8IYB3(0.8628)#Q9Y2W1(0.8921)
P15923	0.733945	21.4067	135	AVG=0.2866#Q9Y230(0.0324)#Q9Y265(0.0614)#P41134(0.0903)#P41970(0.1941)#Q02575(0.594)#Q01196(0.4945)#Q06455(0.4884)#O75081(0.5115)#O75593(0.3726)#P48431(0.5047)#Q09472(0.5829)#P50553(0.5636)#Q86U70(0.3212)#P35222(0.1793)#P35637(0.8346)#Q8NBZ0(0.8197)#Q92793(0.6274)#Q92831(0.1899)#Q15717(0.0583)#P62158(0.1141)#Q96Q27(0.0494)#Q99081(0.8754)#P06400(0.1789)#P17612(0.0513)#P09874(0.0868)#P15884(0.8306)…	AVG=0.8798#Q99081(0.8754)#Q15424(0.8842)
O14497	0.722538	12.2538	39	AVG=0.3529#Q9H2P0(0.4002)#O96019(0.0256)#Q8NFD5(0.7406)#Q9UIG0(0.3082)#Q8WUZ0(0.8802)#P41182(0.3045)#Q99459(0.303)#Q9P2D1(0.4434)#Q13618(0.056)#Q9H8V3(0.1444)#Q15717(0.0583)#P15976(0.1937)#Q14526(0.3042)#Q9UK53(0.282)#Q96J02(0.2049)#Q13351(0.4006)#P04637(0.4962)#Q86U86(0.254)#Q8WUB8(0.3313)#P06401(0.3848)#P10276(0.2229)#Q92785(0.4297)#Q9NRC8(0.205)#P84022(0.1671)#Q15796(0.1863)#Q969G3(0.5523)#P51…	AVG=0.8802#Q8WUZ0(0.8802)
P42568	0.651408	3.52113	41	AVG=0.3553#P05067(0.2039)#P42568(0.6514)#P55198(0.5618)#Q13085(0.0081)#P55197(0.6067)#P51826(0.7406)#P51825(0.7901)#Q9UHB7(0.8091)#Q92624(0.)#Q6W2J9(0.4832)#O60583(0.5329)#O60563(0.5152)#Q00534(0.0675)#P50750(0.0941)#Q8TEK3(0.5083)#Q9Y2J2(0.4158)#Q96JC9(0.6866)#P68104(0.0736)#P13639(0.0047)#O00472(0.4516)#P55199(0.3768)#Q9HB65(0.4181)#Q03111(0.6064)#P14625(0.1382)#Q03164(0.6442)#Q5T3J3(0.2536)#Q5…	AVG=0.5117#O60563(0.5152)#Q8TEK3(0.5083)
Q15942	0.65035	12.2378	53	AVG=0.2619#Q9UGR2(0.143)#Q9UDY2(0.505)#Q9UGI8(0.1615)#P41220(0.3081)#Q9UKY1(0.3379)#O43865(0.1698)#O60232(0.3869)#O75312(0.2527)#O75396(0.0233)#O94888(0.3374)#Q8IY92(0.7334)#Q93008(0.1012)#Q96AC1(0.0485)#Q13404(0.1905)#P54253(0.4957)#Q99439(0.1359)#Q14166(0.0699)#Q15293(0.1752)#Q15785(0.178)#Q15819(0.1586)#Q15843(0.284)#P12814(0.0336)#P40337(0.3709)#P49023(0.5025)#P50552(0.65)#P56945(0.4966)#Q145…	AVG=0.5082#Q9UDY2(0.505)#P49023(0.5025)#P06748(0.517)
P50552	0.65	18.4211	49	AVG=0.2343#O15117(0.7714)#O15162(0.2296)#Q9UGI8(0.1615)#O60936(0.5982)#O75400(0.4201)#P02549(0.0327)#P22736(0.3344)#P27348(0.0408)#P28066(0.0207)#P51617(0.3371)#Q16531(0.0035)#Q9BRP4(0.0102)#Q9C026(0.0465)#Q6XZF7(0.3094)#Q70E73(0.6848)#Q92499(0.027)#Q99816(0.1026)#Q13242(0.2851)#Q13435(0.6615)#Q13573(0.5504)#Q9BWD1(0.0126)#Q14517(0.0641)#Q16222(0.067)#P60953(0.)#P61088(0.0329)#Q12874(0.2076)#P622…	AVG=0.5658#Q4VCS5(0.5111)#P06748(0.517)#P42768(0.6693)
Q6PKG0	0.648723	8.21168	60	AVG=0.1791#Q9UBQ5(0.0413)#Q9UBX3(0.)#Q9Y262(0.0621)#Q04917(0.0732)#O60739(0.1593)#Q07817(0.2146)#O95166(0.0769)#P68400(0.0946)#Q86VP6(0.0431)#P34947(0.1017)#Q92731(0.1)#Q92905(0.0269)#Q93034(0.0077)#Q13616(0.0541)#Q13617(0.0322)#Q13618(0.056)#Q13620(0.1446)#Q14152(0.4457)#Q15717(0.0583)#P60228(0.0337)#P60520(0.0342)#Q96FF9(0.7024)#P62258(0.102)#Q9H8V3(0.1444)#Q99728(0.2239)#Q99613(0.2738)#P03372(…	AVG=0.5105#Q14684(0.5237)#P46783(0.503)#P48431(0.5047)
Q15596	0.648224	12.9781	54	AVG=0.2865#P41235(0.1519)#Q9Y6B2(0.6631)#Q06413(0.5518)#Q09472(0.5829)#Q6UB99(0.7646)#Q63ZY3(0.4148)#Q86X55(0.0625)#Q13136(0.3619)#O60563(0.5152)#O95718(0.2205)#P11802(0.0792)#P17844(0.1515)#P30281(0.137)#P35222(0.1793)#P38398(0.4332)#P54652(0.0673)#Q13535(0.0174)#Q15788(0.499)#Q6P1N0(0.5079)#Q92793(0.6274)#Q92841(0.3567)#P10275(0.3569)#P04150(0.1995)#P43364(0.3543)#P35869(0.145)#P27540(0.5336)#O…	AVG=0.5463#Q9Y6B2(0.6631)#O60563(0.5152)#Q15788(0.499)#Q6P1N0(0.5079)
Q6Y7W6	0.647421	7.69823	41	AVG=0.3168#O60573(0.2531)#P01106(0.4442)#P11940(0.1714)#P51114(0.3784)#P54259(0.8269)#P57678(0.0142)#P63104(0.0776)#Q13283(0.5579)#Q13322(0.2138)#Q14444(0.6291)#Q15717(0.0583)#Q9UHI6(0.2828)#Q9UKV8(0.0722)#P35558(0.0129)#Q16656(0.1352)#P07900(0.1858)#P25054(0.6919)#P31946(0.1382)#Q14240(0.0565)#Q8TF46(0.0512)#Q6P2Q9(0.0163)#O94906(0.187)#Q9NTZ6(0.3337)#Q92600(0.0602)#P14678(0.5417)#P63162(0.525)#…	AVG=0.5491#P63162(0.525)#P09234(0.5094)#Q13435(0.6615)#Q16637(0.5374)#Q86UK7(0.5122)
Q12778	0.647328	12.2137	36	AVG=0.2444#P38936(0.6341)#Q9UNE7(0.1419)#P10275(0.3569)#O95352(0.0299)#P17676(0.5855)#P61981(0.0769)#P63104(0.0776)#P06493(0.)#P03372(0.1681)#P14635(0.2679)#Q92793(0.6274)#P31749(0.1375)#P23945(0.0187)#P49841(0.219)#P41235(0.1519)#P31270(0.3419)#P20719(0.6444)#Q14653(0.2974)#P42704(0.0072)#Q00987(0.4929)#Q9UBE8(0.2676)#P09874(0.0868)#P29590(0.2528)#P10276(0.2229)#Q8NHY2(0.1163)#Q01105(0.6448)#Q96…	AVG=0.4929#Q00987(0.4929)
Q13123	0.64632	5.386	62	AVG=0.319#P43246(0.0064)#Q00597(0.009)#Q00839(0.52)#P49792(0.2053)#P35080(0.)#P37198(0.1992)#Q8WYA6(0.1314)#Q92542(0.0113)#Q92993(0.3119)#Q9BQG0(0.2628)#Q14978(0.8984)#P05067(0.2039)#P98175(0.6247)#P55081(0.6674)#P63244(0.0189)#Q12873(0.337)#Q8TCG1(0.0166)#Q96PK6(0.2392)#Q9NR30(0.3384)#P01106(0.4442)#O14965(0.3598)#O60341(0.2406)#Q70Z53(0.3873)#O15541(0.484)#P62993(0.)#O94906(0.187)#Q96DB2(0.0605…	AVG=0.5671#Q00839(0.52)#P55081(0.6674)#Q5BKZ1(0.5137)
Q01105	0.644828	17.2414	108	AVG=0.2743#Q9Y478(0.1963)#Q9Y6X0(0.7162)#P68400(0.0946)#Q96A08(0.315)#Q12778(0.6473)#Q02818(0.3796)#Q02539(0.8419)#Q00987(0.4929)#Q15172(0.177)#Q92598(0.197)#Q99567(0.0378)#Q99551(0.0251)#Q9H6Z4(0.6984)#Q9Y6K9(0.1718)#P63104(0.0776)#O60260(0.0989)#O75531(0.1236)#P52565(0.1961)#P48736(0.0426)#O00213(0.4789)#P52429(0.0476)#O76081(0.2448)#P05067(0.2039)#P04406(0.0269)#P12544(0.)#P10914(0.3415)#P1553…	AVG=0.5021#Q00987(0.4929)#P04637(0.4962)#P48431(0.5047)#Q15554(0.5148)
Q03164	0.644243	9.07029	73	AVG=0.3396#Q9Y5Z7(0.1237)#P42568(0.6514)#O00257(0.6804)#P01308(0.)#P35226(0.3834)#P55196(0.5027)#P55199(0.3768)#P62805(0.1942)#P84243(0.3676)#Q15369(0.1071)#Q15370(0.3051)#Q71DI3(0.3676)#Q92793(0.6274)#Q92794(0.5494)#Q96Q27(0.0494)#Q9P0U4(0.4055)#O75461(0.21)#Q6P1J9(0.1883)#Q6PD62(0.2839)#Q8TEK3(0.5083)#Q14209(0.3318)#Q16254(0.4044)#Q16695(0.3676)#Q9H7Z6(0.1812)#Q9HC52(0.5373)#Q9P2P5(0.3944)#P041…	AVG=0.5335#O00257(0.6804)#P55196(0.5027)#Q8TEK3(0.5083)#Q9HC52(0.5373)#O60563(0.5152)#P04637(0.4962)#Q01196(0.4945)
Q8TAD8	0.643939	7.57576	45	AVG=0.3844#O14641(0.4946)#Q9UNN5(0.1862)#O43395(0.2914)#Q00534(0.0675)#O75925(0.1843)#Q09472(0.5829)#P49760(0.2846)#Q86Z02(0.1909)#Q8IWX8(0.6343)#Q13485(0.2699)#Q13535(0.0174)#Q15287(0.8361)#Q8N2W9(0.2059)#Q92793(0.6274)#Q99613(0.2738)#Q9NRR4(0.3544)#Q9Y692(0.1571)#P55081(0.6674)#Q15047(0.3904)#Q15796(0.1863)#Q15797(0.2516)#Q53F19(0.6419)#O75400(0.4201)#Q13123(0.6463)#P61244(1.)#O75533(0.2799)#P0…	AVG=0.5521#O14641(0.4946)#P55081(0.6674)#P18583(0.4942)
O14974	0.640777	6.79612	50	AVG=0.1728#Q9UBB4(0.0442)#O15144(0.0367)#O95835(0.5522)#P01100(0.3132)#P06241(0.067)#P61158(0.)#Q09013(0.1033)#Q13616(0.0541)#Q6WCQ1(0.4459)#Q8WUI4(0.4086)#Q99759(0.3275)#Q9BTE6(0.0995)#Q9UKY7(1.)#P51553(0.0382)#Q5S007(0.0123)#P33993(0.0348)#Q8TCJ0(0.0381)#Q92905(0.0269)#Q13976(0.0551)#Q15717(0.0583)#P62993(0.)#P63104(0.0776)#O95466(0.3055)#P10644(0.1129)#Q14005(0.4985)#P32121(0.1296)#O60341(0.24…	AVG=0.4985#Q14005(0.4985)
Q14011	0.639535	0	48	AVG=0.2898#F7VJQ1(0.4247)#Q9UL15(0.0447)#Q86VP6(0.0431)#P05067(0.2039)#P54253(0.4957)#Q14444(0.6291)#Q99728(0.2239)#O75175(0.5405)#P68400(0.0946)#Q92905(0.0269)#Q13616(0.0541)#Q13617(0.0322)#Q13618(0.056)#Q93034(0.0077)#Q15717(0.0583)#P02751(0.1358)#Q92945(0.6442)#Q9H0R8(0.0598)#Q5JVS0(0.8789)#P55795(0.1136)#P61978(0.2549)#P16871(0.0479)#P13861(0.2005)#Q07666(0.6027)#P42166(0.4323)#P42167(0.5881)…	AVG=0.565#P54253(0.4957)#O75175(0.5405)#Q8ND56(0.6587)
Q15428	0.637931	0	131	AVG=0.3917#Q9UHR5(0.4188)#Q9Y6A4(0.0207)#Q9UNP9(0.1063)#O43143(0.166)#O43395(0.2914)#O43660(0.2023)#O43684(0.0976)#O60506(0.3531)#P98175(0.6247)#Q08211(0.1008)#Q00839(0.52)#P49756(0.6667)#O94906(0.187)#Q6P2Q9(0.0163)#P51991(0.4233)#Q7RTV0(0.0455)#Q86XP3(0.4488)#Q8N163(0.3402)#Q8N302(0.5042)#Q6KC79(0.4148)#P38159(0.8696)#Q8WWY3(0.1904)#Q92733(0.8411)#Q92841(0.3567)#Q9BQ61(0.7955)#Q9BQI9(0.3594)#Q1…	AVG=0.5613#Q00839(0.52)#P49756(0.6667)#Q8N302(0.5042)#Q13435(0.6615)#Q9BUJ2(0.5386)#P09234(0.5094)#Q12906(0.5112)#Q99729(0.503)#P14678(0.5417)#O43290(0.5362)#Q01130(0.6787)#Q13243(0.5147)#Q07955(0.4919)#P62995(0.6806)
Q8IXK0	0.636364	15.1515	46	AVG=0.2821#Q9Y295(0.0327)#Q9Y4W6(0.1255)#P46109(0.2739)#O60341(0.2406)#P49736(0.2135)#Q5VTD9(0.2879)#O00257(0.6804)#O95503(0.5631)#P16333(0.0318)#P35227(0.3895)#P49137(0.1325)#Q13643(0.)#Q13895(0.3066)#Q14781(0.6955)#Q16659(0.0818)#Q8TAP4(0.0828)#Q92769(0.252)#Q96JM7(0.2397)#Q9H0I2(0.7139)#Q9NW68(0.507)#Q96EZ8(0.2835)#Q16539(0.0639)#Q9HC52(0.5373)#Q9P2P5(0.3944)#Q16644(0.1675)#O95931(0.3944)#P629…	AVG=0.5215#Q9NW68(0.507)#Q9HC52(0.5373)#Q06587(0.5369)#P48431(0.5047)
Q8IWX8	0.634279	4.36681	39	AVG=0.4095#Q8IX12(0.3922)#Q8N302(0.5042)#Q99459(0.303)#Q9NWB6(0.6374)#Q14562(0.2123)#Q01844(0.8125)#Q70Z53(0.3873)#P63244(0.0189)#P31942(0.1127)#Q5S007(0.0123)#Q9NQ29(0.4286)#O96028(0.2681)#P16499(0.0547)#Q8WUA2(0.3415)#Q8NAV1(0.4551)#O75400(0.4201)#O15067(0.0762)#Q86U06(0.3622)#Q14498(0.2774)#Q9Y580(0.5977)#Q15287(0.8361)#P08621(0.7025)#Q15428(0.6379)#Q15427(0.5991)#Q9NRC8(0.205)#Q8TAD8(0.6439)#…	AVG=0.5202#Q8N302(0.5042)#O43290(0.5362)
P38936	0.634146	12.1951	206	AVG=0.2025#P05067(0.2039)#P04217(0.0606)#P01023(0.0183)#O75419(0.0618)#O96020(0.1535)#P06576(0.0302)#P06493(0.)#P30281(0.137)#P46379(0.5707)#P27348(0.0408)#P60953(0.)#P60709(0.)#Q00534(0.0675)#Q7Z569(0.1486)#Q15078(0.2378)#Q15834(0.3465)#Q9BRK5(0.0414)#Q9H324(0.0553)#P30260(0.2476)#P31749(0.1375)#Q12834(0.2585)#Q9NWV4(0.)#Q99459(0.303)#O15123(0.0101)#O94805(0.0211)#P07858(0.)#P20248(0.2731)#P5169…	AVG=0.502#Q00987(0.4929)#P06748(0.517)#P04637(0.4962)
Q14919	0.634146	19.5122	25	AVG=0.2537#P42773(0.0833)#Q92830(0.1732)#P04183(0.0684)#P05067(0.2039)#Q9HCE6(0.1962)#Q9NRF9(0.483)#Q9NZL4(0.3149)#Q9UBS4(0.0726)#O75593(0.3726)#Q01658(0.2159)#P25208(0.2319)#Q92569(0.0499)#Q9H8W4(0.1406)#P25791(0.1076)#P54727(0.4499)#Q15796(0.1863)#P78362(0.4433)#P55854(0.5728)#Q16594(0.3674)#Q9HBM6(0.2032)#P20226(0.4897)#Q92956(0.0813)#Q9UNY4(0.3167)#P0CG48(0.)#P37275(0.5178)	AVG=0.5037#P20226(0.4897)#P37275(0.5178)
O00401	0.633663	13.8614	54	AVG=0.2758#O15143(0.0188)#O60504(0.5991)#O76064(0.2103)#P05067(0.2039)#P07900(0.1858)#P08238(0.1409)#P16333(0.0318)#P17301(0.0144)#P17706(0.012)#P45378(0.8476)#P46108(0.2599)#P61158(0.)#P61160(0.0127)#Q09472(0.5829)#Q15811(0.2191)#Q96J02(0.2049)#Q9UKP3(0.2277)#Q9UQB8(0.317)#Q9Y5X1(0.2067)#O15116(0.1353)#Q9Y6W5(0.6466)#Q9UNF0(0.3519)#Q9UKS6(0.2406)#O43586(0.0721)#O75400(0.4201)#Q6XZF7(0.3094)#P296…	AVG=0.5324#Q15642(0.5324)
Q9UBB5	0.632603	7.29927	31	AVG=0.2521#Q08211(0.1008)#O60341(0.2406)#O14744(0.0345)#P26358(0.2481)#Q14289(0.112)#Q8WWY6(0.1443)#Q8NHZ7(0.4279)#Q99873(0.0637)#O14519(0.5826)#Q9UGL1(0.1464)#P03372(0.1681)#Q12873(0.337)#Q9UBB5(0.6326)#Q9UHA4(0.)#Q92769(0.252)#Q9HCN4(0.1979)#Q9BQA5(0.2244)#O95983(0.268)#Q13547(0.2386)#Q9BQA1(0.0877)#Q9BTC8(0.1229)#O94776(0.1976)#Q86YP4(0.5466)#Q8WXI9(0.3845)#Q16576(0.0965)#Q09028(0.12)#Q96ST3(0…	AVG=0.5257#Q86YP4(0.5466)#P48431(0.5047)
P18146	0.629834	9.2081	25	AVG=0.3495#P42771(0.1923)#Q8N726(0.6061)#P17676(0.5855)#Q92793(0.6274)#Q09472(0.5829)#P21860(0.2273)#P01584(0.0149)#Q00987(0.4929)#Q13506(0.2382)#Q15742(0.461)#O95644(0.4528)#P04637(0.4962)#Q99471(0.0584)#P78337(0.4204)#P25788(0.098)#P60484(0.129)#O95863(0.2576)#P08047(0.4089)#Q9HD15(0.5763)#Q12772(0.1648)#P63165(0.4455)#Q13207(0.427)#Q04206(0.3194)#P11473(0.1265)#P19544(0.3274)	AVG=0.4945#Q00987(0.4929)#P04637(0.4962)
O75554	0.62766	13.2979	48	AVG=0.4371#O43143(0.166)#O43719(0.6543)#P09012(0.4149)#P0CG13(0.)#P14678(0.5417)#P42858(0.1636)#P50570(0.1943)#P61978(0.2549)#Q15233(0.5287)#Q15427(0.5991)#Q15637(0.7011)#Q8WXF1(0.4474)#Q9BUQ8(0.3561)#P0CG48(0.)#O43684(0.0976)#O14776(0.4517)#O00571(0.2885)#O43395(0.2914)#O43172(0.1092)#O43290(0.5362)#Q14527(0.109)#P23246(0.7355)#O95104(0.7001)#O60610(0.3215)#O75533(0.2799)#P08621(0.7025)#P11940(0…	AVG=0.5222#P14678(0.5417)#Q15233(0.5287)#O43290(0.5362)#Q00839(0.52)#Q5H919(0.4843)
Q92793	0.627355	11.466	262	AVG=0.3363#Q9UJX3(0.1336)#Q9UJX6(0.1144)#P12830(0.1247)#P18846(0.3653)#P18848(0.4245)#P41182(0.3045)#P62736(0.0318)#Q9NT62(0.1178)#O95477(0.0416)#P15336(0.5366)#P18847(0.1934)#P38398(0.4332)#P25054(0.6919)#P31749(0.1375)#Q13948(0.0973)#Q9UJX4(0.0252)#P54252(0.283)#O43918(0.422)#P10275(0.3569)#Q86X55(0.0625)#P24863(0.1343)#P24864(0.1683)#Q13042(0.0758)#P30260(0.2476)#Q12834(0.2585)#P24941(0.0336)#…	AVG=0.5089#P15336(0.5366)#P39880(0.5475)#P98177(0.505)#P20823(0.4865)#P14652(0.4944)#P17482(0.496)#Q92794(0.5494)#O43474(0.5185)#Q00987(0.4929)#Q71SY5(0.5127)#Q15788(0.499)#Q99743(0.4842)#P04637(0.4962)#Q8IZL8(0.4965)#Q9UBK2(0.5439)#Q01196(0.4945)#Q8TAQ2(0.5165)#P20226(0.4897)
A0JLT2	0.627049	4.09836	117	AVG=0.291#Q16531(0.0035)#Q3L8U1(0.3445)#Q6IAN0(0.04)#Q8TEX9(0.0509)#O00571(0.2885)#Q8WYP5(0.297)#O14645(0.3915)#Q92616(0.0105)#Q9BQ39(0.2836)#Q9BQ75(0.319)#Q9BQG0(0.2628)#Q9H1A4(0.0808)#O95232(0.5532)#Q9H8H2(0.342)#Q9NR30(0.3384)#Q9UHV7(0.2783)#O95816(0.1611)#P02545(0.3223)#P05067(0.2039)#Q9UBN7(0.2568)#Q9UHB7(0.8091)#Q9UHI6(0.2828)#P10809(0.0192)#Q9UJX2(0.0536)#Q9UJX4(0.0252)#Q9UJX6(0.1144)#Q9UK…	AVG=0.5102#Q71SY5(0.5127)#Q9NWA0(0.4863)#Q15233(0.5287)#P06748(0.517)#O76021(0.502)#Q16637(0.5374)#Q9Y2X9(0.4872)
Q8IYW5	0.62697	12.2592	29	AVG=0.2548#O60341(0.2406)#Q01844(0.8125)#P33176(0.1796)#O75164(0.1795)#O95714(0.0728)#Q13571(0.1031)#Q15652(0.3303)#Q16778(0.3651)#Q5VYK3(0.0493)#Q6FI13(0.2846)#Q8NBT0(0.1302)#Q8NCN4(0.5664)#Q92499(0.027)#Q14203(0.2621)#P16104(0.3357)#Q16777(0.2713)#Q9Y3C5(0.4416)#O60264(0.1939)#P61956(0.4842)#P63165(0.4455)#P13984(0.0843)#Q12888(0.7216)#Q14669(0.3399)#P61077(0.102)#P60604(0.0242)#P0CG47(0.)#P0CG…	AVG=0.4842#P61956(0.4842)
P98175	0.624731	12.9032	55	AVG=0.2975#P38919(0.0389)#P85299(0.4175)#P46531(0.1542)#Q92917(0.5168)#O43143(0.166)#P54259(0.8269)#P26599(0.1186)#Q86V42(0.4267)#P55769(0.0625)#Q9UKA9(0.0791)#Q9H9G7(0.0442)#Q9HCK5(0.0604)#Q5U5Q3(0.4067)#Q8IX12(0.3922)#Q5VVJ2(0.1606)#Q92620(0.3651)#Q92733(0.8411)#Q13618(0.056)#P55795(0.1136)#P61326(0.)#P61978(0.2549)#P62258(0.102)#Q504Q3(0.0191)#Q9NRD1(0.1229)#P02545(0.3223)#P01106(0.4442)#P1784…	AVG=0.5152#Q92917(0.5168)#P09234(0.5094)#Q13573(0.5504)#P61956(0.4842)
Q9UMN6	0.624678	9.94475	34	AVG=0.2776#Q9UBL3(0.3455)#Q71DI3(0.3676)#P54253(0.4957)#P04083(0.0491)#P00519(0.4416)#P20073(0.3053)#P06241(0.067)#P05026(0.0429)#P46108(0.2599)#P62993(0.)#Q14451(0.1898)#P38936(0.6341)#P41182(0.3045)#P04183(0.0684)#P16333(0.0318)#Q14686(0.7998)#Q16612(0.5588)#Q9BTK6(1.)#Q6ZW49(0.2984)#Q13526(0.4172)#O43586(0.0721)#P61224(0.0489)#Q15291(0.3606)#P18754(0.0855)#O95059(0.0403)#Q92599(0.1718)#P84022(…	AVG=0.5058#P54253(0.4957)#Q16637(0.5374)#Q96KM6(0.4843)
P09429	0.623256	4.65116	62	AVG=0.3268#Q9UKR5(0.0357)#P84243(0.3676)#Q08117(0.2589)#Q92793(0.6274)#Q14194(0.1259)#P04150(0.1995)#P24941(0.0336)#P14921(0.0204)#P17096(1.)#P26583(0.8756)#P10275(0.3569)#P50570(0.1943)#P02751(0.1358)#P06493(0.)#P20823(0.4865)#P61978(0.2549)#P11142(0.0898)#P14653(0.7475)#P14651(0.7146)#P09630(0.2511)#P28358(0.3235)#P31277(0.497)#P31249(0.5509)#P28356(0.6222)#P13378(0.5862)#P48729(0.1128)#Q5T3J3(…	AVG=0.509#P20823(0.4865)#P31277(0.497)#P31249(0.5509)#P04637(0.4962)#Q969G3(0.5523)#P61956(0.4842)#P20226(0.4897)#Q15554(0.5148)
O15027	0.623222	13.7678	32	AVG=0.1765#Q00653(0.2633)#Q99759(0.3275)#Q00535(0.)#P49674(0.2885)#Q86VP6(0.0431)#Q13418(0.0332)#Q13618(0.056)#Q504Q3(0.0191)#Q9NRM7(0.4623)#Q96S44(0.1107)#O95758(0.1304)#P15735(0.0222)#Q9UBN7(0.2568)#Q9BY41(0.0504)#Q15051(0.0217)#P48729(0.1128)#O15084(0.0123)#O95835(0.5522)#Q96DB2(0.0605)#Q9H4B6(0.2089)#P29353(0.4923)#Q9NRC8(0.205)#P48431(0.5047)#Q15554(0.5148)#P55072(0.1079)#P54274(0.3781)#P013…	AVG=0.516#O95835(0.5522)#P29353(0.4923)#P48431(0.5047)#Q15554(0.5148)
Q92541	0.622535	7.04225	26	AVG=0.2155#Q9UBC3(0.3529)#Q9Y6K1(0.33)#Q06124(0.1374)#P49407(0.1818)#P05067(0.2039)#P28328(0.0262)#P40939(0.0079)#P55084(0.)#P60033(0.)#P68400(0.0946)#P46934(0.2616)#Q6P1J9(0.1883)#Q8WVC0(0.7613)#Q6PD62(0.2839)#Q8N7H5(0.435)#Q9Y5B9(0.1977)#P78362(0.4433)#Q08945(0.3977)#P42224(0.0227)#P61956(0.4842)#P23193(0.2193)#Q7Z2W7(0.0118)#P0CG48(0.)#P49459(0.2434)#P63146(0.3026)#Q9GZS3(0.0164)	AVG=0.4842#P61956(0.4842)
Q15648	0.621126	8.22264	83	AVG=0.2838#Q9Y2X0(0.057)#Q9UHV7(0.2783)#Q9Y5B0(0.5453)#P38398(0.4332)#Q969H0(0.2348)#Q13315(0.0239)#Q9BUE0(0.0577)#P04150(0.1995)#P10275(0.3569)#P15976(0.1937)#P23769(0.4667)#P24863(0.1343)#Q06546(0.0661)#Q12756(0.1047)#Q71F56(0.3172)#Q92830(0.1732)#Q9BTT4(0.1185)#Q9P086(0.094)#Q15717(0.0583)#Q15910(0.248)#Q96RN5(0.4162)#Q9NVC6(0.0876)#Q99814(0.2632)#O95817(0.8609)#P27348(0.0408)#Q9BWU1(0.3187)#O…	AVG=0.5098#Q9Y5B0(0.5453)#Q00987(0.4929)#Q71SY5(0.5127)#Q9NWA0(0.4863)#P04637(0.4962)#Q9UBK2(0.5439)#Q5BKZ1(0.5137)#Q9Y2X9(0.4872)
Q9UER7	0.62027	4.05405	100	AVG=0.2552#Q12834(0.2585)#O15169(0.5882)#O60566(0.2076)#O15519(0.0271)#O43570(0.0565)#P16220(0.2551)#P17676(0.5855)#Q96KE9(0.1237)#Q13618(0.056)#Q5M775(0.4747)#Q86X55(0.0625)#Q99873(0.0637)#Q9UNE7(0.1419)#O43293(0.0661)#Q03188(0.5122)#Q13315(0.0239)#P27037(0.0117)#Q92793(0.6274)#P10275(0.3569)#P35520(0.1452)#O43918(0.422)#Q9UER7(0.6203)#P46100(0.5538)#Q9UBU7(0.1766)#P35659(0.5573)#Q9NPF5(0.3597)#…	AVG=0.5249#Q03188(0.5122)#P46100(0.5538)#P35659(0.5573)#Q00987(0.4929)#P04637(0.4962)#Q13573(0.5504)#P61956(0.4842)#Q9NQB0(0.5525)
Q9P2E9	0.619858	15.6028	33	AVG=0.3049#P40692(0.1812)#Q9Y237(0.3664)#Q9UKY7(1.)#O43633(0.3423)#O60828(0.7774)#O75506(0.3553)#O95182(0.7345)#P52272(0.2096)#P30405(0.058)#P34931(0.0218)#Q92731(0.1)#Q13618(0.056)#Q13887(0.3545)#Q9BZL6(0.205)#Q15004(1.)#Q96EL3(0.1518)#P61006(0.1014)#Q9H492(0.1157)#Q12906(0.5112)#P63173(0.2143)#P60981(0.0303)#Q6VMQ6(0.6772)#P22307(0.0238)#P29558(0.1749)#Q15051(0.0217)#P39019(0.3172)#Q8IY92(0.733…	AVG=0.5112#Q12906(0.5112)
Q13480	0.618156	14.4092	68	AVG=0.2158#P51451(0.097)#Q8WV28(0.7259)#O75815(0.2424)#P07332(0.1192)#P46108(0.2599)#Q06187(0.0926)#Q07021(0.117)#O95817(0.8609)#P46109(0.2739)#P00533(0.0851)#Q9UQC2(0.5917)#O75791(0.3303)#P62993(0.)#P08631(0.1008)#Q96JZ2(0.5312)#Q08881(0.0387)#P41743(0.1107)#P43405(0.1024)#P06239(0.0255)#P07948(0.1406)#Q99759(0.3275)#Q7KZI7(0.4505)#P08581(0.0086)#O43639(0.0711)#P16333(0.0318)#Q92569(0.0499)#P279…	AVG=0.5136#Q96JZ2(0.5312)#Q8TEW0(0.5524)#P49023(0.5025)#Q05209(0.4897)#P29353(0.4923)
Q99750	0.617886	12.1951	136	AVG=0.2909#Q9UKJ5(0.0727)#Q9ULA0(0.0421)#O43186(0.4682)#O43299(0.0682)#O43734(0.4199)#O60269(0.5044)#O60573(0.2531)#Q01844(0.8125)#Q00587(0.7877)#Q02040(0.4417)#O94817(0.3714)#Q6UX72(0.1741)#Q6ZU52(0.3804)#Q5T686(0.6395)#Q5TA45(0.0233)#Q8IYR0(0.0691)#Q8IYX3(0.4039)#Q8N715(0.6613)#Q8NEC5(0.5128)#Q8TAI1(0.6585)#Q8TAP4(0.0828)#Q8TBE0(0.6513)#Q8TC90(0.5764)#Q8WUT4(0.2608)#Q8WVV9(0.155)#Q8WXS3(0.9056)…	AVG=0.515#O60269(0.5044)#Q8NEC5(0.5128)#Q12906(0.5112)#Q5T6C5(0.5526)#Q7Z3B3(0.4941)#P17482(0.496)#Q9H7E9(0.5022)#P15172(0.5562)#P32242(0.5028)#Q8WV24(0.5337)#Q15475(0.5)#Q15583(0.5037)#O15015(0.5249)
Q07157	0.617277	8.00915	69	AVG=0.1945#O00501(0.0367)#O14493(0.0191)#O15551(0.0409)#Q9Y4J8(0.2221)#P41743(0.1107)#Q9Y5S2(0.1397)#O43815(0.25)#O43819(0.0902)#Q04721(0.1461)#P04264(0.3059)#P09758(0.0402)#P12814(0.0336)#P16989(0.8118)#P32745(0.2584)#P57087(0.0336)#Q16625(0.2165)#Q9BX67(0.0258)#Q9Y624(0.0134)#Q07666(0.6027)#O75380(0.)#O95292(0.0576)#Q5TCQ9(0.4256)#Q8IWZ8(0.4589)#Q8N144(0.2483)#Q8TEW0(0.5524)#Q92930(0.0725)#P567…	AVG=0.52#Q8TEW0(0.5524)#P55196(0.5027)#Q9UDY2(0.505)
P17542	0.616314	12.0846	53	AVG=0.2977#Q9Y295(0.0327)#O43463(0.)#Q04759(0.0142)#Q01826(0.3657)#O75081(0.5115)#Q13309(0.1203)#Q14839(0.3609)#Q16576(0.0965)#Q12873(0.337)#P09874(0.0868)#O43439(0.4255)#O95696(0.206)#P18754(0.0855)#P12980(0.5786)#Q04837(0.0405)#P17542(0.6163)#P25800(0.0705)#P23771(0.5124)#P46108(0.2599)#Q86XI2(0.0315)#Q96BH3(0.)#Q9UKL0(0.4959)#Q9C0K0(0.5257)#P15884(0.8306)#Q13547(0.2386)#P17482(0.496)#P06400(0.…	AVG=0.506#O75081(0.5115)#P23771(0.5124)#Q9UKL0(0.4959)#Q9C0K0(0.5257)#P17482(0.496)#Q01196(0.4945)
Q13247	0.613372	0	37	AVG=0.3342#Q9UBK2(0.5439)#P98175(0.6247)#O75494(0.687)#Q86VP6(0.0431)#Q8WXA9(0.7402)#Q92905(0.0269)#P05067(0.2039)#P27348(0.0408)#P61981(0.0769)#Q15287(0.8361)#Q96SB4(0.4336)#Q13573(0.5504)#Q13616(0.0541)#Q13617(0.0322)#Q14684(0.5237)#Q15428(0.6379)#Q15717(0.0583)#P62258(0.102)#Q504Q3(0.0191)#Q99728(0.2239)#P09651(0.4785)#P62633(0.0734)#Q15427(0.5991)#P38919(0.0389)#Q9UPE1(0.3386)#P61326(0.)#P033…	AVG=0.5222#Q9UBK2(0.5439)#Q13573(0.5504)#Q14684(0.5237)#P09651(0.4785)#Q15554(0.5148)
Q93052	0.612745	4.90196	36	AVG=0.1914#P50416(0.0285)#P39748(0.1921)#Q7Z2Z2(0.1366)#P30153(0.0102)#Q86TI2(0.0301)#O15145(0.0899)#P27797(0.4676)#P56134(0.1277)#Q14738(0.2193)#Q6UW56(0.0437)#Q96KS0(0.4201)#Q9NZL4(0.3149)#Q9UI26(0.0267)#Q9UJU6(0.4442)#Q96AY3(0.1065)#P54105(0.4262)#Q15717(0.0583)#P14866(0.3633)#P11021(0.0795)#Q14847(0.387)#Q8TAT6(0.)#O15294(0.0182)#Q32P28(0.0693)#Q9NVS9(0.046)#Q9Y570(0.1943)#P35241(0.4048)#P460…	AVG=0.5103#Q15527(0.5156)#Q9UDY2(0.505)
P19419	0.607477	21.028	27	AVG=0.2312#Q00534(0.0675)#Q15717(0.0583)#P05067(0.2039)#P19419(0.6075)#Q04741(0.3191)#Q09472(0.5829)#Q01844(0.8125)#Q8TCJ0(0.0381)#Q01543(0.3319)#Q13547(0.2386)#Q92826(0.0915)#O43474(0.5185)#Q9UI95(0.0474)#O95772(0.265)#P45983(0.2084)#P27361(0.0871)#P45984(0.1675)#P53779(0.153)#P28482(0.0389)#Q9UM07(0.0226)#Q9Y3A3(0.0667)#P11831(0.4114)#O75716(0.0393)#P63165(0.4455)#P37840(0.3429)#P63279(0.0759)#…	AVG=0.5185#O43474(0.5185)
Q03111	0.60644	3.57782	28	AVG=0.4524#O00472(0.4516)#O14646(0.4275)#O60885(0.8172)#P42568(0.6514)#P55199(0.3768)#P68400(0.0946)#Q13085(0.0081)#Q6P1J9(0.1883)#Q6W2J9(0.4832)#P55198(0.5618)#O60563(0.5152)#P55197(0.6067)#Q9HC52(0.5373)#P51825(0.7901)#P50750(0.0941)#Q8TEK3(0.5083)#Q9UHB7(0.8091)#Q92731(0.1)#P16401(0.8451)#Q16695(0.3676)#Q03164(0.6442)#Q8N7H5(0.435)#O00287(0.5809)#P48382(0.5942)#P24928(0.2746)#Q96EB6(0.4578)#P6…	AVG=0.5211#Q6W2J9(0.4832)#P55198(0.5618)#O60563(0.5152)#Q9HC52(0.5373)#Q8TEK3(0.5083)
Q96RL1	0.606398	11.1266	61	AVG=0.2313#Q6ZW49(0.2984)#P54725(0.3388)#Q99728(0.2239)#Q15406(0.2229)#Q16656(0.1352)#Q16777(0.2713)#Q16778(0.3651)#Q12888(0.7216)#O14936(0.1177)#O14641(0.4946)#P04637(0.4962)#P36957(0.2031)#Q06609(0.0855)#P54132(0.2414)#P63279(0.0759)#Q00987(0.4929)#Q53H96(0.0474)#P63165(0.4455)#Q5VYK3(0.0493)#Q9C086(0.8006)#Q9NTI2(0.0357)#P16104(0.3357)#Q13283(0.5579)#Q4VCS5(0.5111)#P12757(0.1959)#Q9UM82(0.2019…	AVG=0.5061#O14641(0.4946)#P04637(0.4962)#Q00987(0.4929)#Q13283(0.5579)#Q4VCS5(0.5111)#P61956(0.4842)
Q8N726	0.606061	0	125	AVG=0.2227#O14965(0.3598)#P51959(0.)#O43707(0.0527)#P02730(0.1317)#P24385(0.1288)#P53396(0.0645)#P60709(0.)#P63261(0.)#Q13535(0.0174)#Q8WUW1(0.2133)#P38398(0.4332)#Q562R1(0.016)#P68133(0.0318)#Q9NXV6(0.5121)#Q9UQ88(0.5913)#P53365(0.2727)#P30279(0.09)#Q99459(0.303)#O75419(0.0618)#Q99741(0.1589)#O00311(0.101)#P11802(0.0792)#Q00534(0.0675)#Q96JB5(0.0534)#P49760(0.2846)#Q8N668(0.0632)#Q6UXH1(0.0793)#…	AVG=0.5137#Q9NXV6(0.5121)#P33240(0.5598)#Q00839(0.52)#Q00987(0.4929)#P06748(0.517)#P04637(0.4962)#P14678(0.5417)#Q8TEE9(0.4975)#P51532(0.4766)#P61956(0.4842)#P25490(0.5531)
Q15599	0.605341	11.8694	47	AVG=0.2213#Q5T2W1(0.1541)#O15439(0.0513)#P13569(0.0318)#P29275(0.0151)#Q01814(0.148)#P23508(0.2557)#O43707(0.0527)#Q9HBW0(0.0513)#P48048(0.0332)#P07550(0.1864)#P15311(0.3362)#P61916(0.)#A8MXV4(0.232)#Q9BXS6(0.737)#Q6GQQ9(0.4614)#O15530(0.1511)#P09619(0.0949)#O60346(0.3186)#Q6ZVD8(0.1474)#P42336(0.0056)#Q00722(0.1764)#Q01970(0.2658)#O00592(0.5681)#P50897(0.)#P60484(0.129)#Q03431(0.1804)#P01112(0.)…	AVG=0.5546#Q15654(0.5546)
Q8TBK6	0.604167	5.20833	26	AVG=0.3848#A0JLT2(0.627)#Q9Y383(0.4464)#O75400(0.4201)#Q7Z7J5(0.1879)#Q8TAD8(0.6439)#O43290(0.5362)#O43395(0.2914)#P04637(0.4962)#P61289(0.0236)#P68104(0.0736)#Q13123(0.6463)#Q13427(0.7825)#Q13435(0.6615)#Q13526(0.4172)#Q14498(0.2774)#Q14562(0.2123)#Q70Z53(0.3873)#Q8NAV1(0.4551)#Q96MF2(0.4093)#Q9NVV9(0.1127)#Q9NWB6(0.6374)#Q8WYA6(0.1314)#Q15365(0.0534)#O95391(0.459)#P62316(0.3729)#Q01081(0.2417)	AVG=0.5162#O43290(0.5362)#P04637(0.4962)
Q9C0J8	0.603293	9.73054	31	AVG=0.2816#Q9Y2X7(0.2904)#Q6UN15(0.771)#O95251(0.4108)#Q5RL73(0.267)#P35080(0.)#Q99873(0.0637)#Q99963(0.0922)#Q13573(0.5504)#Q9BVJ6(0.489)#P04637(0.4962)#P11802(0.0792)#P26641(0.1259)#Q14676(0.7434)#Q15287(0.8361)#Q99728(0.2239)#Q15717(0.0583)#Q9H4L7(0.23)#Q99459(0.303)#Q9NVC6(0.0876)#P05161(0.0606)#P09651(0.4785)#Q9NR20(0.275)#P49760(0.2846)#P63165(0.4455)#Q00534(0.0675)#Q96DB2(0.0605)#P0CG48(0.…	AVG=0.5035#Q13573(0.5504)#Q9BVJ6(0.489)#P04637(0.4962)#P09651(0.4785)
Q07666	0.602709	9.02934	137	AVG=0.2588#Q9UNE7(0.1419)#O43390(0.3807)#P46109(0.2739)#Q06187(0.0926)#O60861(0.2458)#O43307(0.095)#P09769(0.0227)#P22681(0.5099)#P35568(0.6957)#P42685(0.0099)#P46108(0.2599)#P49418(0.4676)#P78352(0.0566)#Q08211(0.1008)#Q08881(0.0387)#Q12959(0.1527)#Q13158(0.1202)#Q14011(0.6395)#Q14790(0.0793)#Q15700(0.0701)#Q15811(0.2191)#Q68CJ9(0.4534)#Q6XZF7(0.3094)#Q8IZD9(0.1502)#Q8N157(0.3194)#Q92608(0.0443)…	AVG=0.5173#P22681(0.5099)#Q96KQ4(0.5459)#Q9NYB9(0.5556)#O00213(0.4789)#Q5VWX1(0.5358)#O75525(0.4769)#P04637(0.4962)#O95153(0.5417)#P09651(0.4785)#P63162(0.525)#Q13573(0.5504)#Q5TCZ1(0.5128)
Q5JWF2	0.6027	8.67888	34	AVG=0.1692#O75746(0.031)#P49407(0.1818)#P50148(0.0111)#P01892(0.1041)#P30443(0.1973)#Q16658(0.0426)#P30450(0.1151)#P34897(0.0655)#P04439(0.1425)#Q5JWF2(0.6027)#P34998(0.0293)#P59768(0.1268)#P62158(0.1141)#P62873(0.)#P07550(0.1864)#Q6IAA8(0.2919)#Q00987(0.4929)#Q02818(0.3796)#P80303(0.2357)#Q96CV9(0.3588)#P35558(0.0129)#P43119(0.1736)#P22234(0.0094)#P41220(0.3081)#Q9NPQ8(0.2034)#Q9Y265(0.0614)#Q9Y…	AVG=0.4827#Q00987(0.4929)#Q99614(0.4726)
Q04323	0.602694	10.101	93	AVG=0.1797#O00762(0.2235)#Q9UBS4(0.0726)#Q9Y263(0.0516)#Q9Y639(0.1332)#Q9UMX0(0.4448)#O43583(0.3434)#O43865(0.1698)#O15347(0.655)#O94903(0.1055)#P05187(0.0766)#P11802(0.0792)#P17812(0.1134)#P23508(0.2557)#P47712(0.0681)#P49411(0.0199)#Q13489(0.0712)#Q13490(0.0874)#Q13885(0.0652)#Q16594(0.3674)#Q16665(0.3039)#Q16881(0.0755)#Q9ULC4(0.0331)#Q9UNZ2(0.3946)#O60232(0.3869)#O75396(0.0233)#P50225(0.0373)…	AVG=0.5118#A0MZ66(0.5277)#Q99614(0.4726)#Q96K21(0.535)
Q13950	0.602687	9.59693	45	AVG=0.2961#Q9UBN7(0.2568)#Q9UQL6(0.4216)#O15379(0.1005)#Q9UNE7(0.1419)#P29590(0.2528)#Q92831(0.1899)#Q13547(0.2386)#P06400(0.1789)#P35548(0.5655)#P36894(0.047)#Q09472(0.5829)#Q16665(0.3039)#Q92793(0.6274)#Q14469(0.4429)#P56524(0.3976)#Q15466(0.0739)#Q16656(0.1352)#P01106(0.4442)#P14921(0.0204)#Q13526(0.4172)#Q14192(0.)#Q8WYB5(0.5002)#Q8WUI4(0.4086)#Q96PK6(0.2392)#P05412(0.2266)#P01100(0.3132)#Q15…	AVG=0.5002#Q8WYB5(0.5002)
Q8TDR0	0.602026	8.68307	68	AVG=0.1935#O43707(0.0527)#O60641(0.5182)#P34931(0.0218)#Q8IY31(0.0455)#P05067(0.2039)#P11532(0.0782)#P20248(0.2731)#Q12840(0.1366)#Q13439(0.1251)#Q16891(0.1491)#Q7Z3B3(0.4941)#Q8TDR0(0.602)#Q96KQ4(0.5459)#Q9NV70(0.1051)#Q9NVK5(0.1067)#Q9UPN3(0.0981)#P38646(0.0898)#Q15555(0.4128)#Q96EV8(0.2621)#Q99459(0.303)#P68032(0.0292)#P68104(0.0736)#P68133(0.0318)#Q9NYB9(0.5556)#P78559(0.8323)#P07900(0.1858)#…	AVG=0.511#O60641(0.5182)#Q7Z3B3(0.4941)#Q96KQ4(0.5459)#Q9NYB9(0.5556)#Q9P2Q2(0.4783)#P83731(0.5032)#Q12962(0.4817)
Q969G5	0.601533	7.66284	28	AVG=0.2032#Q9UMX5(0.2674)#P43243(0.5372)#Q03135(0.0449)#O43852(0.0381)#P49411(0.0199)#P56539(0.053)#Q12905(0.1641)#Q12906(0.5112)#P19022(0.1192)#P11586(0.0118)#P01106(0.4442)#Q9UBC2(0.5127)#O95758(0.1304)#P11498(0.0136)#P46778(0.3562)#Q16540(0.3856)#Q13405(0.1747)#P62249(0.1781)#P62854(0.4435)#O95810(0.7035)#Q9H9B4(0.0311)#Q13813(0.0287)#Q01082(0.1087)#P51571(0.)#Q9NP81(0.0985)#P78371(0.0224)#P67…	AVG=0.5204#P43243(0.5372)#Q12906(0.5112)#Q9UBC2(0.5127)
	0.26304	11.106
	0.107072
	0.884897	0.735658
	0.869	0.689
	0.794	0.39
	0.705	0.79
	0.758	0.543
	0.828	0.626
	0.7908	0.6076

## Sheet: Supplementary Table S2
Supplementary Table S2. List of 100 least disordered hubs in human. Proteins shown in red font are discussed in the article. The proteins are sorted by their degree in the PPI network (promiscuity).
UniProt ID	Disorder content (computed using consensus of IUPred and Espritz)	Number of disordered protein binding regions per unit of 1000 AA (computed with DisoRDPbind)	Degree (promiscuity)	All interactors (UniProt ID is followed by the disorder content of this interactor; AVG is the average disorder content of these interactors)
P0CG48	0	0	8548	AVG=0.1999#O00327(0.3642)#O00472(0.4516)#O00501(0.0367)#O00548(0.0982)#O00555(0.4076)#O00560(0.0302)#P40189(0.1383)#O00743(0.0197)#O00750(0.1634)#O00767(0.0808)#Q9UBC2(0.5127)#Q9UBF6(0.2478)#P40259(0.0611)#O14490(0.3654)#O14503(0.3908)#Q9UBN4(0.0512)#O14543(0.2178)#O14544(0.2393)#O14579(0.0455)#O14682(0.0153)#P40424(0.3581)#O14827(0.1447)#A7E2Y1(0.1566)#A7KAX9(0.4485)#O14921(0.0377)#Q9UBU8(0.2597…
P62993	0	0	804	AVG=0.2421#O14672(0.0989)#Q9UBS4(0.0726)#Q9UBS5(0.0968)#O15085(0.5381)#O15234(0.9744)#O15320(0.4192)#O15360(0.0357)#O15371(0.1168)#Q9Y2D5(0.8824)#Q9Y2H0(0.6351)#Q9Y587(0.)#Q9Y5Y3(0.0242)#Q9Y613(0.3797)#P41970(0.1941)#P42566(0.3783)#P42575(0.0841)#Q9ULD4(0.3934)#P43004(0.0679)#O43150(0.2674)#O43281(0.5847)#P46092(0.1243)#Q06187(0.0926)#O60888(0.1117)#P98082(0.5558)#O75369(0.0453)#Q01484(0.5221)#O7…
P60709	0	0	263	AVG=0.1956#O14639(0.3085)#Q96AP0(0.4301)#P05067(0.2039)#P27348(0.0408)#P12821(0.0161)#Q00005(0.0248)#P01023(0.0183)#P63104(0.0776)#P60709(0.)#P63261(0.)#P42025(0.0186)#Q9H9G7(0.0442)#Q9HCK5(0.0604)#Q13155(0.0406)#P31749(0.1375)#P10275(0.3569)#Q9BY76(0.1182)#P04083(0.0491)#P08133(0.0238)#P07355(0.)#P20073(0.3053)#Q96CW1(0.0391)#P61160(0.0127)#P61158(0.)#P49407(0.1818)#P32121(0.1296)#Q9NQ11(0.0695)…
Q9NUX5	0	0	200	AVG=0.2741#A8MZ97(0.3969)#P42126(0.0166)#O43707(0.0527)#Q02221(0.2474)#P55209(0.3146)#Q16656(0.1352)#Q9NQX4(0.031)#P67870(0.0837)#O00154(0.1)#O00571(0.2885)#O15523(0.2667)#O43365(0.7449)#O43598(0.1552)#O43602(0.2766)#O43768(0.9752)#O60496(0.3277)#O60936(0.5982)#O75131(0.0168)#O75781(0.6744)#O75821(0.3938)#O94808(0.0117)#O95336(0.0388)#O95817(0.8609)#O95833(0.0381)#O96013(0.4382)#P00338(0.)#P04406…
P60033	0	0	198	AVG=0.2357#P31749(0.1375)#O43707(0.0527)#P11586(0.0118)#P12814(0.0336)#P25705(0.)#P48047(0.0282)#P60033(0.)#Q92688(0.4502)#P60709(0.)#P53634(0.0346)#P19397(0.)#P08962(0.)#P01730(0.0284)#P30480(0.1381)#P15391(0.446)#P27701(0.015)#P21926(0.)#Q99439(0.1359)#P23528(0.0301)#Q9Y281(0.0301)#O43809(0.0573)#Q16630(0.7368)#P20023(0.0106)#P50238(0.2338)#P67870(0.0837)#Q92841(0.3567)#O15523(0.2667)#O00571(0.…
P61326	0	0	190	AVG=0.326#O00148(0.0843)#O14744(0.0345)#P02533(0.1165)#P04264(0.3059)#P08727(0.05)#P11142(0.0898)#P13645(0.274)#P13647(0.0932)#P14866(0.3633)#P16403(0.8216)#P22087(0.324)#P23458(0.0347)#P23588(0.9002)#P35527(0.3403)#P35908(0.2128)#P38646(0.0898)#P46821(0.7123)#P47756(0.0469)#P49327(0.0267)#P52907(0.1049)#P54105(0.4262)#P54132(0.2414)#P60709(0.)#P61978(0.2549)#P61981(0.0769)#P62633(0.0734)#P68032(…
P02768	0	0	172	AVG=0.1882#P49748(0.0947)#P61981(0.0769)#P05067(0.2039)#Q00005(0.0248)#O60239(0.5495)#P02768(0.)#P35368(0.2654)#Q15758(0.085)#P02760(0.0142)#Q01432(0.0939)#Q9BXS5(0.0236)#Q9UPM8(0.0624)#P02647(0.03)#P02652(0.06)#P06727(0.0909)#P02655(0.2178)#P02656(0.0808)#P02654(0.0602)#P02649(0.041)#P20933(0.0347)#Q13315(0.0239)#Q96PG8(0.9042)#Q9BXH1(0.7461)#Q8TDN4(0.2512)#Q9P0X4(0.3176)#P07711(0.012)#O75419(0.…
Q00535	0	0	156	AVG=0.2314#O95831(0.1175)#O95816(0.1611)#O43852(0.0381)#P05067(0.2039)#P12236(0.0134)#P24385(0.1288)#P46379(0.5707)#P49418(0.4676)#Q00536(0.2621)#Q14094(0.0849)#Q13085(0.0081)#Q16543(0.1958)#Q8WWM7(0.7656)#Q8TDN4(0.2512)#P38398(0.4332)#Q9BTV7(0.3996)#P20248(0.2731)#P24864(0.1683)#Q00526(0.0131)#Q07002(0.1928)#Q00535(0.)#Q15078(0.2378)#P14635(0.2679)#P30281(0.137)#Q86YS7(0.116)#P30279(0.09)#P38936…
P60953	0	0	153	AVG=0.2388#P42574(0.0758)#Q7Z465(0.4678)#P32121(0.1296)#P56945(0.4966)#P60953(0.)#Q6NZY7(0.9595)#Q86VW2(0.2948)#Q9H3Q1(0.8315)#Q9NRR3(0.2738)#O95477(0.0416)#P11274(0.3714)#P15169(0.0808)#P12830(0.1247)#P02749(0.)#P01023(0.0183)#P05814(0.1239)#P49407(0.1818)#Q12982(0.328)#Q15052(0.1186)#Q9Y2D8(0.1254)#Q9UKI2(0.3858)#Q00005(0.0248)#Q00587(0.7877)#O15085(0.5381)#P22681(0.5099)#Q14155(0.1905)#Q9NRR8(…
P06493	0	0	151	AVG=0.3037#O15392(0.1972)#P49748(0.0947)#P31947(0.1613)#P38398(0.4332)#Q16543(0.1958)#Q96GD4(0.1105)#O95817(0.8609)#O43683(0.1253)#P01732(0.0979)#P05814(0.1239)#P10415(0.2469)#P24864(0.1683)#P33076(0.1159)#P41002(0.2214)#Q13948(0.0973)#Q69YH5(0.4213)#Q96FF9(0.7024)#Q99741(0.1589)#P24385(0.1288)#P29374(0.5823)#P30153(0.0102)#P30154(0.0266)#P78396(0.0108)#P06493(0.)#O95067(0.1834)#P20248(0.2731)#P1…
P63000	0	0	145	AVG=0.2145#O14578(0.1426)#O15068(0.2366)#Q9Y2A7(0.0266)#Q9Y2Y0(0.0798)#Q9Y613(0.3797)#Q9Y6X2(0.2293)#P42685(0.0099)#P42858(0.1636)#Q9UP83(0.056)#Q02779(0.4602)#Q03135(0.0449)#Q05397(0.2072)#O60260(0.0989)#O60318(0.2348)#O60477(0.0053)#O60890(0.2968)#Q01968(0.0733)#Q09013(0.1033)#Q6UXH1(0.0793)#Q7L576(0.008)#Q86UR1(0.2731)#P30622(0.2691)#P35228(0.0659)#Q8IVI9(0.081)#Q8IW93(0.2805)#Q6DT37(0.2921)#Q…
P05141	0	0	142	AVG=0.1582#Q13131(0.1181)#P07550(0.1864)#P01023(0.0183)#P12236(0.0134)#Q9UL18(0.0478)#Q9UKV8(0.0722)#Q9HCK5(0.0604)#P50995(0.3644)#P25705(0.)#P06576(0.0302)#O95817(0.8609)#Q99643(0.)#Q86VP6(0.0431)#P50750(0.0941)#P10809(0.0192)#Q13286(0.1553)#O75503(0.0391)#Q96I36(0.3158)#P00395(0.)#Q7Z7K0(0.1981)#Q92905(0.0269)#Q7L5N1(0.0153)#Q13616(0.0541)#Q13617(0.0322)#Q13618(0.056)#Q13619(0.0474)#Q13620(0.14…
P62330	0	0	141	AVG=0.156#O00203(0.2093)#P59780(0.)#P00505(0.0093)#P05067(0.2039)#P08195(0.1492)#P27695(0.2138)#P53396(0.0645)#Q12904(0.1635)#P52209(0.0145)#P30480(0.1381)#P20309(0.1288)#Q9Y312(0.013)#P07355(0.)#P53365(0.2727)#P49407(0.1818)#P32121(0.1296)#Q9ULH1(0.3561)#P20290(0.4709)#P11586(0.0118)#Q96A33(0.3085)#Q9H993(0.0136)#O75390(0.0129)#O00299(0.0622)#Q9BPX3(0.0985)#Q9BT78(0.032)#Q9HB71(0.2018)#Q99418(0.…
O43463	0	0	140	AVG=0.2662#Q9UBC3(0.3529)#Q9UDY8(0.0704)#Q9Y230(0.0324)#Q9Y2Z2(0.0307)#P41134(0.0903)#Q9Y483(0.3305)#Q9UIH9(0.3606)#Q9UJX2(0.0536)#Q9Y6J0(0.3378)#Q9Y6K1(0.33)#Q9UQL6(0.4216)#Q02246(0.0625)#Q02363(0.3284)#P83916(0.6649)#P84022(0.1671)#O43295(0.2985)#O75558(0.0348)#O95248(0.1853)#O95260(0.2413)#P06241(0.067)#P18847(0.1934)#P22692(0.2054)#P28749(0.0833)#P35222(0.1793)#P35637(0.8346)#P45973(0.5812)#P…
P0CG47	0	0	117	AVG=0.2157#Q9UER7(0.6203)#Q9Y2H0(0.6351)#Q9Y2M0(0.1357)#Q9UNA4(0.2446)#Q9UM54(0.1298)#P46527(0.8586)#P46531(0.1542)#P46934(0.2616)#Q06330(0.178)#O76064(0.2103)#P49407(0.1818)#P49917(0.0187)#Q7L5N1(0.0153)#Q86VP6(0.0431)#Q86XA0(0.)#Q6GQQ9(0.4614)#Q5VTR2(0.2646)#Q8IYW5(0.627)#Q5VZV1(0.178)#Q8N0X7(0.3393)#Q68DV7(0.4342)#P32121(0.1296)#Q92905(0.0269)#Q93034(0.0077)#Q96AZ1(0.1239)#P54252(0.283)#Q13501…
P62244	0	0	114	AVG=0.1857#O00567(0.2609)#Q9Y2X3(0.2287)#Q9UL18(0.0478)#Q9UKV8(0.0722)#Q9UKW6(0.0377)#P39023(0.1191)#P46087(0.564)#O60216(0.3708)#P46783(0.503)#Q01844(0.8125)#P48729(0.1128)#Q00839(0.52)#Q10471(0.0771)#O95166(0.0769)#P52272(0.2096)#Q7L5N1(0.0153)#Q5S007(0.0123)#Q86VP6(0.0431)#P35558(0.0129)#P36915(0.3773)#Q92905(0.0269)#Q93034(0.0077)#Q13151(0.3246)#Q9BVP2(0.3242)#Q13616(0.0541)#Q9BVS4(0.1612)#Q1…
P63261	0	0	112	AVG=0.229#P60709(0.)#Q562R1(0.016)#P27348(0.0408)#P63104(0.0776)#P63261(0.)#P68133(0.0318)#P07550(0.1864)#Q9GZX7(0.)#P04083(0.0491)#P02649(0.041)#P51572(0.0569)#P38398(0.4332)#Q8WUW1(0.2133)#P12830(0.1247)#Q01518(0.2168)#P40123(0.2516)#Q8N726(0.6061)#P42771(0.1923)#Q13352(0.339)#P23528(0.0301)#Q9Y281(0.0301)#Q14019(0.1197)#P56545(0.0921)#O60716(0.3884)#P60981(0.0303)#Q9NRI5(0.2471)#Q9NPF5(0.3597)…
P35232	0	0	101	AVG=0.2468#O14647(0.4869)#O14672(0.0989)#Q9UKA4(0.1899)#Q9UKV8(0.0722)#Q9UL18(0.0478)#P46821(0.7123)#O60506(0.3531)#Q07021(0.117)#O75306(0.0151)#O75376(0.6955)#O75489(0.0947)#Q5S007(0.0123)#Q86U86(0.254)#P01100(0.3132)#P02545(0.3223)#P03372(0.1681)#P05141(0.)#P06748(0.517)#P08238(0.1409)#P10275(0.3569)#P12814(0.0336)#P31946(0.1382)#P42658(0.1179)#P52907(0.1049)#P55008(0.2721)#P55209(0.3146)#P6070…
O00231	0	0	98	AVG=0.1801#Q9Y3C7(0.145)#Q9Y5U4(0.0667)#Q9UQL6(0.4216)#O43741(0.2721)#O60260(0.0989)#O60383(0.0925)#Q06455(0.4884)#Q00653(0.2633)#O75832(0.)#P05067(0.2039)#P35998(0.0531)#P43686(0.012)#P54257(0.2504)#P62191(0.1841)#P62333(0.0411)#P68104(0.0736)#Q14194(0.1259)#Q16186(0.3931)#Q7L5N1(0.0153)#Q96ID5(0.167)#Q9GZT6(0.0197)#Q9H7U1(0.4293)#Q9NPI1(0.3932)#O00232(0.0307)#Q5S007(0.0123)#P34947(0.1017)#P3522…
P25705	0	0	96	AVG=0.153#P31946(0.1382)#P60709(0.)#P61981(0.0769)#P62258(0.102)#Q9H845(0.0064)#P05141(0.)#P24539(0.0195)#P07550(0.1864)#P05067(0.2039)#P01023(0.0183)#P49407(0.1818)#P27348(0.0408)#P63104(0.0776)#Q5TC12(0.0732)#Q8N5M1(0.1107)#P36542(0.0268)#P48047(0.0282)#P80723(1.)#Q06187(0.0926)#Q16790(0.3094)#Q86VP6(0.0431)#P01730(0.0284)#P60033(0.)#P24941(0.0336)#P50750(0.0941)#P68400(0.0946)#Q92905(0.0269)#Q…
P07355	0	0	84	AVG=0.1958#Q00005(0.0248)#P30153(0.0102)#P30480(0.1381)#P60709(0.)#P05067(0.2039)#P27348(0.0408)#P63104(0.0776)#P02749(0.)#P62330(0.)#P49407(0.1818)#P32121(0.1296)#P20648(0.0647)#O95817(0.8609)#O75815(0.2424)#P07858(0.)#P01730(0.0284)#P14209(0.7351)#P24941(0.0336)#P50750(0.0941)#P50613(0.0491)#P13688(0.1445)#P23508(0.2557)#Q13617(0.0322)#O75937(0.4308)#O60739(0.1593)#Q09472(0.5829)#P04626(0.1849)…
P10599	0	0	80	AVG=0.1766#O00418(0.2497)#P38936(0.6341)#P40692(0.1812)#O43865(0.1698)#O60232(0.3869)#O60260(0.0989)#O60506(0.3531)#Q06830(0.1307)#Q00535(0.)#O95166(0.0769)#Q7L5N1(0.0153)#Q8IUQ4(0.0887)#P31939(0.0068)#P32119(0.0909)#Q96BK5(0.7927)#Q13616(0.0541)#Q13617(0.0322)#Q13620(0.1446)#P60520(0.0342)#Q96GG9(0.0541)#Q9GZQ8(0.064)#P61956(0.4842)#Q9H0R8(0.0598)#Q9H492(0.1157)#Q9H9B4(0.0311)#Q504Q3(0.0191)#P63…
P61086	0	0	80	AVG=0.1805#Q9UBU9(0.2359)#Q9Y5A7(0.1577)#Q9UM11(0.2661)#O75400(0.4201)#Q6XUX3(0.0452)#P30480(0.1381)#Q8N2W9(0.2059)#Q8WVD3(0.1388)#Q9BRA2(0.0407)#Q96EQ8(0.1164)#Q15811(0.2191)#O15344(0.1124)#O94941(0.1331)#O95786(0.0324)#P14373(0.0429)#P14635(0.2679)#P22392(0.)#P50876(0.0342)#P63165(0.4455)#P78317(0.3263)#Q00610(0.0113)#Q06587(0.5369)#Q13064(0.2288)#Q6Q0C0(0.1597)#Q6UWE0(0.166)#Q6UXS9(0.0352)#Q6Z…
P22392	0	0	78	AVG=0.1462#Q9Y2J4(0.6701)#O75874(0.0193)#Q00613(0.3875)#P50502(0.4553)#Q7Z465(0.4678)#Q8IVU3(0.0509)#Q8IZL9(0.0665)#Q15034(0.0086)#P61626(0.)#Q9HB71(0.2018)#P62807(0.3254)#P63104(0.0776)#Q9NPH2(0.0502)#P53396(0.0645)#P03372(0.1681)#P01616(0.)#P15531(0.)#Q00987(0.4929)#Q13232(0.)#P00492(0.0413)#P14324(0.)#Q13283(0.5579)#Q13363(0.1)#Q14161(0.3584)#Q14204(0.0189)#Q9UII4(0.0312)#P33176(0.1796)#P16152…
P62873	0	0	76	AVG=0.1896#Q9UBB4(0.0442)#Q06187(0.0926)#P49407(0.1818)#Q6ZSZ5(0.4101)#Q7L576(0.008)#P31749(0.1375)#Q15717(0.0583)#P02771(0.)#P84996(0.7444)#Q9BTE6(0.0995)#Q9NRI5(0.2471)#P04626(0.1849)#P08913(0.3578)#Q15375(0.)#P25098(0.0102)#P23508(0.2557)#P03372(0.1681)#P07550(0.1864)#Q9UBI6(0.1806)#Q9P2W3(0.1045)#P50151(0.2206)#P63211(0.0541)#P61952(0.4932)#P63215(0.1467)#P59768(0.1268)#P50150(0.2133)#O60262(…
Q9BQ66	0	0	75	AVG=0.3056#Q9UBX3(0.)#Q9UKJ5(0.0727)#Q03014(0.4037)#O60269(0.5044)#O60573(0.2531)#Q00587(0.7877)#O75791(0.3303)#O75909(0.5828)#O76003(0.0119)#O94817(0.3714)#Q6UY11(0.0392)#Q6UY14(0.3752)#P29972(0.0186)#Q8IYF1(0.745)#Q8IYX3(0.4039)#Q8N715(0.6613)#Q8NE01(0.1047)#Q8NEC5(0.5128)#Q8TBE0(0.6513)#Q969U6(0.0459)#O95990(0.375)#P12236(0.0134)#P17482(0.496)#P17858(0.0064)#P26992(0.1102)#P27658(0.7298)#P5425…
Q14192	0	0	74	AVG=0.209#O00716(0.3548)#Q9Y2G2(0.0186)#P41240(0.0178)#Q01094(0.3707)#P54253(0.4957)#Q9BS26(0.1084)#O75935(0.0484)#P05067(0.2039)#P16220(0.2551)#Q13642(0.0588)#Q13643(0.)#Q14209(0.3318)#Q16254(0.4044)#P03372(0.1681)#P07384(0.007)#P00533(0.0851)#Q13873(0.3054)#P10275(0.3569)#P35222(0.1793)#Q9Y6W6(0.0871)#P18847(0.1934)#P38398(0.4332)#Q14192(0.)#Q9UBI6(0.1806)#P08631(0.1008)#O94992(0.805)#P24593(0.…
O43175	0	0	71	AVG=0.2597#O00418(0.2497)#O00422(0.2876)#Q9UQN3(0.3521)#Q9UQL6(0.4216)#P05067(0.2039)#Q15811(0.2191)#Q16659(0.0818)#Q99759(0.3275)#Q9Y6I3(0.7552)#O75503(0.0391)#Q6UW78(0.3548)#Q7L2J0(0.5486)#Q86VP6(0.0431)#Q8TCJ0(0.0381)#Q92542(0.0113)#Q93034(0.0077)#Q13286(0.1553)#Q13418(0.0332)#Q13617(0.0322)#Q13618(0.056)#Q13123(0.6463)#Q99459(0.303)#Q14676(0.7434)#P60520(0.0342)#Q9GZQ8(0.064)#Q9H0R8(0.0598)#Q…
P15498	0	0	70	AVG=0.2285#P42680(0.0412)#P46531(0.1542)#Q04759(0.0142)#Q06187(0.0926)#P50402(0.3228)#P29597(0.1019)#Q8IZP0(0.5472)#Q8WV28(0.7259)#Q92608(0.0443)#Q13480(0.6182)#Q14289(0.112)#P60953(0.)#P61586(0.1244)#P61978(0.2549)#Q99704(0.3888)#P02545(0.3223)#P17947(0.2296)#P04626(0.1849)#P21860(0.2273)#P06239(0.0255)#P00533(0.0851)#P07437(0.0788)#P04049(0.213)#O75530(0.1587)#P05107(0.0403)#P06213(0.1122)#P061…
Q9GZX7	0	0	69	AVG=0.1381#O95433(0.1124)#P05067(0.2039)#P30153(0.0102)#P63261(0.)#Q9GZX7(0.)#O95816(0.1611)#Q9UKF6(0.0161)#Q8WYA6(0.1314)#Q15038(0.2738)#Q9UMR2(0.0793)#Q9NR30(0.3384)#P31689(0.1385)#Q8WW22(0.1259)#O60884(0.2112)#Q96EY1(0.0875)#P68104(0.0736)#P41214(0.1627)#Q9Y3B2(0.0205)#Q13868(0.041)#Q9NQT5(0.0873)#Q9NQT4(0.1277)#Q96B26(0.0326)#Q9NPD3(0.0816)#Q06265(0.2506)#Q5RKV6(0.2426)#Q15024(0.0447)#Q01780(…
P49720	0	0	65	AVG=0.1609#Q9Y5U4(0.0667)#O60260(0.0989)#O60739(0.1593)#O14818(0.0927)#P04637(0.4962)#P20810(1.)#P28066(0.0207)#P30480(0.1381)#P49720(0.)#P56537(0.0286)#Q14164(0.0475)#Q53H96(0.0474)#Q6XUX3(0.0452)#Q9Y244(0.0638)#Q9Y2T2(0.)#P33176(0.1796)#P35998(0.0531)#Q8TAA3(0.0703)#Q13616(0.0541)#Q14318(0.2621)#Q9H4G0(0.4245)#P63104(0.0776)#Q9P2P5(0.3944)#P53350(0.1194)#P17980(0.0342)#O95817(0.8609)#P25788(0.0…
P00338	0	0	63	AVG=0.1406#Q9UQL6(0.4216)#P49917(0.0187)#Q86VP6(0.0431)#P31749(0.1375)#Q92830(0.1732)#Q92993(0.3119)#Q93034(0.0077)#Q96AP0(0.4301)#Q13618(0.056)#Q9BYZ2(0.0105)#Q9C0B1(0.0634)#Q16719(0.0237)#Q9H0R8(0.0598)#Q9H8V3(0.1444)#Q9NRD1(0.1229)#Q9P287(0.1975)#P20823(0.4865)#P05161(0.0606)#P08754(0.0254)#P00390(0.0441)#O60706(0.031)#P63104(0.0776)#Q7L1Q6(0.0907)#P52209(0.0145)#Q00796(0.0364)#Q14654(0.0487)#…
P62937	0	0	63	AVG=0.2231#Q9UQL6(0.4216)#O14810(0.8731)#P49407(0.1818)#Q01860(0.3583)#O95166(0.0769)#Q6ZW49(0.2984)#P31749(0.1375)#Q92905(0.0269)#Q13616(0.0541)#Q13618(0.056)#Q13620(0.1446)#Q15717(0.0583)#P60520(0.0342)#Q15843(0.284)#Q16656(0.1352)#Q9GZQ8(0.064)#Q9H0R8(0.0598)#Q9H492(0.1157)#O60674(0.0115)#O95831(0.1175)#P05067(0.2039)#P63098(0.0353)#Q08209(0.1171)#Q08881(0.0387)#Q9BY43(0.4955)#P62993(0.)#P6310…
P01112	0	5.29101	62	AVG=0.2377#Q9Y297(0.0165)#Q9UJ41(0.2401)#P42336(0.0056)#P42684(0.3875)#Q9UKT9(0.3183)#P49721(0.0299)#Q7Z569(0.1486)#Q92888(0.3476)#Q13574(0.2838)#Q15599(0.6053)#Q15843(0.284)#Q16656(0.1352)#Q96RT1(0.4023)#Q9NS23(0.093)#P81274(0.0804)#P05783(0.0163)#P21359(0.0669)#P09382(0.)#P20936(0.0602)#O00329(0.0441)#P04637(0.4962)#O75398(0.2124)#P06213(0.1122)#P11233(0.1214)#P10398(0.2706)#P22681(0.5099)#Q96K…
P21673	0	0	62	AVG=0.2227#O15197(0.0529)#Q9Y383(0.4464)#Q9Y3C7(0.145)#Q9UKR5(0.0357)#Q9ULA0(0.0421)#O60383(0.0925)#O60512(0.257)#P51693(0.3185)#Q6PI98(0.2812)#O95251(0.4108)#Q7L5N1(0.0153)#Q5RL73(0.267)#Q5UIP0(0.3669)#Q8TBB1(0.1648)#P32456(0.0508)#Q92993(0.3119)#Q96BY9(0.1445)#Q13574(0.2838)#Q9BWH2(0.0582)#Q9BYD2(0.0487)#Q14194(0.1259)#Q12873(0.337)#P61604(0.)#Q16665(0.3039)#Q9GZT6(0.0197)#Q9H8M9(0.2895)#Q9HBL7…
P35544	0	0	61	AVG=0.1633#O00418(0.2497)#P41240(0.0178)#Q05655(0.0251)#O60739(0.1593)#Q07020(0.2926)#Q00535(0.)#P48729(0.1128)#P49841(0.219)#Q86VP6(0.0431)#P08865(0.2847)#P16871(0.0479)#P23396(0.1934)#P26599(0.1186)#P39019(0.3172)#P62244(0.)#P62249(0.1781)#P62269(0.125)#P62277(0.1192)#P62701(0.0646)#P62857(0.1884)#P63167(0.0562)#Q13813(0.0287)#Q13895(0.3066)#Q15545(0.5158)#Q7L5N1(0.0153)#Q96BK5(0.7927)#Q9NRX1(0…
P52815	0	0	61	AVG=0.2106#Q9Y3B7(0.099)#P84098(0.3622)#O60260(0.0989)#Q07020(0.2926)#Q07021(0.117)#P98179(0.6369)#Q00005(0.0248)#P50914(0.3628)#P30050(0.103)#Q7Z7H8(0.1303)#Q86VP6(0.0431)#Q8TAE8(0.4595)#Q13616(0.0541)#P13631(0.2467)#Q14164(0.0475)#Q13618(0.056)#Q9P015(0.223)#P54819(0.1213)#Q9BYD2(0.0487)#Q9BYD6(0.0954)#Q14103(0.3775)#Q15067(0.0197)#P58107(0.1124)#Q16656(0.1352)#Q12906(0.5112)#Q5JRX3(0.0694)#P62…
Q8TAT6	0	0	57	AVG=0.2478#O00716(0.3548)#Q9UKV5(0.2644)#O43390(0.3807)#O75955(0.0164)#P49356(0.0481)#P49863(0.0265)#Q7Z3E5(0.2668)#Q86TI2(0.0301)#P05455(0.2598)#P25963(0.2555)#P35520(0.1452)#Q01658(0.2159)#Q93052(0.6127)#Q96AY3(0.1065)#Q9BZE9(0.396)#P58546(0.)#Q15717(0.0583)#Q15843(0.284)#Q9P2P5(0.3944)#P02545(0.3223)#P14866(0.3633)#P07550(0.1864)#P14618(0.0188)#Q96CS3(0.227)#Q9UNN5(0.1862)#Q16656(0.1352)#Q9UNZ…
P51571	0	0	55	AVG=0.163#Q9Y478(0.1963)#Q9UMX5(0.2674)#P42892(0.013)#Q9UMR5(0.)#P49662(0.0902)#O14730(0.1734)#P43307(0.3252)#Q13233(0.3796)#Q76N89(0.3531)#Q9BRT8(0.1038)#Q9BUV8(0.1022)#Q9HC24(0.0378)#Q9Y244(0.0638)#Q9Y5J5(0.0787)#O95166(0.0769)#Q5S007(0.0123)#Q86VP6(0.0431)#P35228(0.0659)#Q8IZL9(0.0665)#Q8NE63(0.2273)#Q92905(0.0269)#Q93034(0.0077)#Q969G5(0.6015)#Q13286(0.1553)#Q13618(0.056)#P60520(0.0342)#Q9H0R…
Q9P2S5	0	0	53	AVG=0.1489#O00483(0.1358)#O14832(0.0533)#O15294(0.0182)#Q9Y266(0.568)#Q9UHV9(0.3831)#Q9UNS2(0.0544)#O43242(0.2097)#O60925(0.0656)#O00159(0.0038)#Q6P2I7(0.1507)#Q7L5D6(0.1529)#Q66GS9(0.0614)#Q8N163(0.3402)#P31948(0.1823)#Q13200(0.0903)#Q13263(0.3054)#Q13098(0.11)#Q9BVP2(0.3242)#P55072(0.1079)#P56192(0.0611)#P57678(0.0142)#P58107(0.1124)#P61201(0.0858)#P61626(0.)#Q9H3U1(0.0307)#Q9H936(0.0557)#O1521…
P61604	0	0	52	AVG=0.1586#P42574(0.0758)#P51693(0.3185)#Q13185(0.5519)#P29372(0.2886)#Q9H1Y0(0.0327)#P05091(0.0406)#P24941(0.0336)#P15336(0.5366)#P11171(0.419)#P30480(0.1381)#P10809(0.0192)#Q9BY43(0.4955)#P27707(0.0346)#Q14194(0.1259)#Q6XUX3(0.0452)#P68104(0.0736)#Q9UKR5(0.0357)#Q86XK2(0.1748)#P49789(0.0272)#P02751(0.1358)#O95166(0.0769)#P32456(0.0508)#P60520(0.0342)#Q9H0R8(0.0598)#P38646(0.0898)#O75874(0.0193)…
O75832	0	0	50	AVG=0.1831#O60260(0.0989)#O60256(0.0136)#O60496(0.3277)#P02545(0.3223)#P19838(0.1581)#P30279(0.09)#P52565(0.1961)#P62807(0.3254)#Q86U70(0.3212)#Q9Y530(0.0592)#Q01860(0.3583)#P29692(0.3416)#P35998(0.0531)#Q9BW60(0.0287)#P60896(0.8714)#Q9NWV8(0.2736)#P04637(0.4962)#Q9BRP4(0.0102)#P11802(0.0792)#P17980(0.0342)#P62333(0.0411)#P43358(0.3502)#P62191(0.1841)#Q00987(0.4929)#P62195(0.0714)#P43686(0.012)#O…
P61158	0	0	48	AVG=0.2024#Q92688(0.4502)#Q92747(0.0243)#P60709(0.)#O15143(0.0188)#P61160(0.0127)#Q9BPX5(0.2288)#O15144(0.0367)#O15145(0.0899)#P59998(0.0238)#O15511(0.3179)#O43852(0.0381)#P16070(0.5741)#Q8IW35(0.1908)#O43303(0.1601)#O60739(0.1593)#P03372(0.1681)#Q92731(0.1)#P02751(0.1358)#Q96AY3(0.1065)#Q96AE4(0.6522)#P62993(0.)#Q86Y56(0.0538)#P52597(0.041)#P17535(0.4755)#P22694(0.0256)#Q5S007(0.0123)#O14974(0.6…
Q9BSB4	0	0	47	AVG=0.1062#Q8WYN0(0.0377)#P49189(0.0182)#Q676U5(0.1582)#Q9BSB4(0.)#Q9H1Y0(0.0327)#P08243(0.)#P05089(0.0621)#Q9P2R3(0.024)#O75143(0.236)#P16152(0.1625)#Q16543(0.1958)#P53621(0.0596)#Q9Y678(0.0503)#P67870(0.0837)#Q08554(0.0358)#P40939(0.0079)#P55084(0.)#P13804(0.0511)#Q02790(0.1416)#O43524(0.6582)#O95166(0.0769)#P60520(0.0342)#Q9H0R8(0.0598)#P19367(0.0055)#Q7Z794(0.1661)#P17858(0.0064)#P36776(0.099…
Q9BUZ4	0	0	47	AVG=0.2251#O15111(0.0255)#Q02224(0.0955)#P51617(0.3371)#Q8IUC6(0.4677)#P36941(0.3103)#O14744(0.0345)#O43294(0.4338)#O43353(0.1093)#P02794(0.1148)#P13224(0.0583)#P17980(0.0342)#P22681(0.5099)#P23443(0.2571)#P35579(0.1724)#P43489(0.3213)#P52732(0.0578)#Q07011(0.1059)#Q13137(0.2018)#Q13895(0.3066)#Q14289(0.112)#Q5JY77(0.2688)#Q5VU43(0.24)#Q7L5A3(0.6264)#Q86YD7(0.9246)#Q99743(0.4842)#Q9BUZ4(0.)#Q9HAU…
Q9H5I1	0	0	47	AVG=0.2274#O00746(0.0428)#Q9UFW8(0.1018)#Q9Y483(0.3305)#Q02363(0.3284)#P45973(0.5812)#P46108(0.2599)#O60318(0.2348)#Q01844(0.8125)#O94885(0.5678)#Q8IXL6(0.2449)#Q8NEU8(0.1024)#Q8TBB1(0.1648)#Q99996(0.1033)#Q16656(0.1352)#Q96H20(0.0504)#Q9H1D9(0.019)#Q9H2G9(0.1375)#P06241(0.067)#P19105(0.152)#P19174(0.0667)#P27986(0.0994)#P29353(0.4923)#Q99717(0.2602)#P62993(0.)#P16333(0.0318)#O95931(0.3944)#P0051…
P23284	0	0	46	AVG=0.1782#Q9Y4Z0(0.3885)#Q01813(0.0128)#Q08211(0.1008)#Q96BK5(0.7927)#P54707(0.0308)#Q14164(0.0475)#Q15154(0.5445)#Q9H0U3(0.)#Q9HC24(0.0378)#P63104(0.0776)#Q9NRD1(0.1229)#Q9P2P5(0.3944)#P13667(0.0729)#P49069(0.4088)#P50570(0.1943)#P07237(0.0807)#P15336(0.5366)#P11021(0.0795)#P13569(0.0318)#P14625(0.1382)#P30480(0.1381)#P23508(0.2557)#P04114(0.0031)#P53041(0.0802)#P01236(0.0485)#P46060(0.1755)#P2…
P39210	0	0	46	AVG=0.1187#Q9UHA4(0.)#O43390(0.3807)#Q8N4V1(0.1145)#Q92520(0.022)#P14866(0.3633)#P00533(0.0851)#P08174(0.2178)#P28288(0.0288)#Q13421(0.0698)#Q9UHQ9(0.0426)#Q9UI09(0.0414)#O95299(0.)#O95168(0.0775)#O43674(0.0688)#O95139(0.2031)#P17568(0.2847)#Q9Y6M9(0.2067)#O75380(0.)#O75251(0.1408)#O00217(0.)#P50542(0.1111)#Q96EY7(0.0726)#Q9UHX1(0.127)#P07919(0.3407)#P11233(0.1214)#Q8NFJ5(0.084)#P61586(0.1244)#Q9…
P55084	0	0	45	AVG=0.2078#Q9BW61(0.451)#P17661(0.1085)#P07550(0.1864)#Q9BSB4(0.)#Q14061(0.3175)#P15336(0.5366)#P38936(0.6341)#P19784(0.04)#P20073(0.3053)#Q9NRD1(0.1229)#O95166(0.0769)#P60520(0.0342)#Q9H0R8(0.0598)#P62993(0.)#Q14451(0.1898)#P34947(0.1017)#P08238(0.1409)#Q15051(0.0217)#P17612(0.0513)#P04183(0.0684)#Q8WVC0(0.7613)#Q13233(0.3796)#Q5U5Q3(0.4067)#Q8N4Q1(0.4437)#Q9GZQ8(0.064)#Q9BXW4(0.1224)#Q9H492(0.1…
P62834	0	5.43478	44	AVG=0.1775#O00522(0.0245)#Q9UBI6(0.1806)#P42345(0.0404)#O75912(0.169)#O75937(0.4308)#P52272(0.2096)#P52306(0.0082)#Q92888(0.3476)#Q14697(0.0636)#Q15165(0.)#Q15717(0.0583)#P60520(0.0342)#P60953(0.)#Q12967(0.2549)#Q96JH8(0.2363)#Q12906(0.5112)#P04629(0.0289)#P62873(0.)#P63104(0.0776)#P04049(0.213)#P21127(0.6013)#P15056(0.2794)#P11233(0.1214)#P30153(0.0102)#P48039(0.0286)#P55196(0.5027)#O43924(0.04)…
P15531	0	0	42	AVG=0.1574#Q9UQL6(0.4216)#Q00796(0.0364)#Q16539(0.0639)#Q9H0R8(0.0598)#Q9H492(0.1157)#Q9H8Y8(0.3739)#Q9NRD1(0.1229)#Q9NRG0(0.2595)#P06132(0.0599)#O14965(0.3598)#O75874(0.0193)#P15976(0.1937)#P14174(0.)#P11308(0.323)#P14324(0.)#P30281(0.137)#P05556(0.0476)#Q9GZT8(0.0504)#P51116(0.4591)#P15531(0.)#Q13232(0.)#P22392(0.)#O00746(0.0428)#Q96HA8(0.1122)#Q86TP1(0.1876)#P63000(0.)#P55042(0.3539)#Q16576(0.…
P21926	0	0	42	AVG=0.0954#O14672(0.0989)#P01892(0.1041)#P04229(0.0226)#P08133(0.0238)#P08195(0.1492)#P08962(0.)#P15391(0.446)#P16070(0.5741)#P19397(0.)#P60033(0.)#P16671(0.)#P27701(0.015)#Q9UBY8(0.0944)#Q8WWI5(0.0472)#Q9Y4D1(0.2217)#Q15717(0.0583)#Q9P2B2(0.0193)#P51570(0.0153)#P15814(0.2441)#Q969P0(0.0473)#P08648(0.0686)#P26006(0.058)#P23229(0.0504)#P05556(0.0476)#P10721(0.0184)#P17252(0.0625)#Q08380(0.0103)#Q0…
P14174	0	0	41	AVG=0.1857#O15519(0.0271)#Q9UNE7(0.1419)#Q00994(0.6667)#O95166(0.0769)#Q6XUX3(0.0452)#Q7L5N1(0.0153)#Q13418(0.0332)#P60520(0.0342)#Q9H0R8(0.0598)#Q9H1Y0(0.0327)#Q9H8Y8(0.3739)#P78318(0.2743)#P02751(0.1358)#P29372(0.2886)#P13612(0.0165)#O43427(0.011)#P07900(0.1858)#Q7Z465(0.4678)#P11171(0.419)#O60739(0.1593)#Q14164(0.0475)#P30480(0.1381)#Q86XK2(0.1748)#Q9Y478(0.1963)#P04233(0.3142)#Q92905(0.0269)#…
P24752	0	0	41	AVG=0.1624#Q9UQL6(0.4216)#O00628(0.)#Q04837(0.0405)#O60216(0.3708)#Q08050(0.557)#O75955(0.0164)#P30504(0.1475)#P31040(0.0286)#Q92616(0.0105)#Q92905(0.0269)#Q13616(0.0541)#Q13618(0.056)#P56192(0.0611)#Q15424(0.8842)#P60520(0.0342)#Q9H4B7(0.0488)#P63165(0.4455)#Q9NRC8(0.205)#Q9NRD1(0.1229)#Q99798(0.0577)#P21549(0.0153)#P21912(0.0179)#P14927(0.1441)#O60739(0.1593)#P01241(0.0553)#P24752(0.)#P29372(0.…
P28799	0	0	40	AVG=0.2259#O43741(0.2721)#Q96AQ9(0.4964)#Q9NRD1(0.1229)#P80370(0.0209)#P24941(0.0336)#P17735(0.0264)#O60563(0.5152)#O76003(0.0119)#P35555(0.0171)#P46109(0.2739)#P50750(0.0941)#P54259(0.8269)#Q16610(0.35)#Q5VTD9(0.2879)#Q16526(0.0853)#P13569(0.0318)#P51959(0.)#O15265(0.6659)#Q92837(0.6846)#O00555(0.4076)#Q9P2P5(0.3944)#P49639(0.3463)#P05783(0.0163)#Q15418(0.0844)#P06748(0.517)#O00459(0.2212)#P9816…
P40429	0	0	40	AVG=0.1142#O00567(0.2609)#Q8NBJ4(0.5761)#Q8NFZ0(0.1582)#Q9BV10(0.0205)#Q9UL18(0.0478)#Q9UKV8(0.0722)#Q86VP6(0.0431)#Q5U5Q3(0.4067)#Q93034(0.0077)#Q969P0(0.0473)#Q13616(0.0541)#Q13618(0.056)#P60520(0.0342)#Q16656(0.1352)#Q9H0R8(0.0598)#Q12986(0.3268)#P62158(0.1141)#Q504Q3(0.0191)#Q96S44(0.1107)#P19525(0.1488)#P05362(0.0489)#P13612(0.0165)#P14921(0.0204)#Q9H3D4(0.3338)#P38919(0.0389)#P49354(0.1768)…
P62487	0	0	40	AVG=0.2546#O15514(0.2324)#Q9UL03(0.1905)#Q6P9B9(0.0981)#P30876(0.0315)#Q8IXW5(0.2925)#Q8TDD1(0.4574)#Q68E01(0.1074)#P38398(0.4332)#P52434(0.0733)#Q16620(0.0584)#P53803(0.2069)#Q9H204(0.2978)#Q9H6D8(0.3462)#P19387(0.1818)#P19388(0.1048)#P61218(0.4252)#P62487(0.)#P62875(0.)#Q9BTT4(0.1185)#P15172(0.5562)#P52435(0.0855)#Q9NWA0(0.4863)#Q9NX70(0.32)#P24928(0.2746)#O75569(0.1118)#O60318(0.2348)#O94762(0…
P84077	0	0	40	AVG=0.1455#O00189(0.0596)#O43747(0.0779)#P59780(0.)#P20309(0.1288)#P84077(0.)#Q9UPM8(0.0624)#Q10567(0.0632)#P61204(0.)#P53367(0.2601)#P53365(0.2727)#P15336(0.5366)#P24941(0.0336)#P53618(0.0472)#O14579(0.0455)#Q9Y678(0.0503)#Q99418(0.1025)#P26641(0.1259)#P24390(0.)#Q9NRD1(0.1229)#Q9H0R8(0.0598)#Q9UJY5(0.3678)#Q9NZ52(0.2905)#P34947(0.1017)#Q15751(0.1428)#P13612(0.0165)#O60271(0.3073)#Q96T76(0.0087)…
Q9NXR7	0	0	40	AVG=0.2366#Q9Y2D5(0.8824)#P38398(0.4332)#Q99728(0.2239)#Q2TAZ0(0.2126)#P46736(0.0222)#Q9NWV8(0.2736)#Q9UJS0(0.0267)#Q92905(0.0269)#Q13616(0.0541)#Q6IAN0(0.04)#Q6UWZ7(0.1663)#Q15018(0.4)#Q14318(0.2621)#Q5VTD9(0.2879)#P34897(0.0655)#P62993(0.)#P42704(0.0072)#Q14676(0.7434)#Q96T76(0.0087)#Q9Y6Q9(0.5892)#Q96CV9(0.3588)#P04637(0.4962)#Q6ZW49(0.2984)#P35232(0.)#P22626(0.4646)#P04844(0.0143)#Q9UNL2(0.07…
P35080	0	0	39	AVG=0.2503#Q9Y478(0.1963)#Q9Y6Y0(0.0717)#O43143(0.166)#Q01581(0.1019)#O95169(0.0806)#P30480(0.1381)#O95466(0.3055)#P36957(0.2031)#P49771(0.1702)#P63261(0.)#P68104(0.0736)#Q8TAX7(0.8143)#Q96FC9(0.1289)#Q9BQD7(0.1489)#Q9H0I3(0.0743)#Q9UI08(0.6899)#Q9Y613(0.3797)#P60520(0.0342)#Q9H0R8(0.0598)#Q14789(0.2007)#P42858(0.1636)#P11171(0.419)#Q13332(0.0719)#Q13123(0.6463)#Q9NTX7(0.4903)#Q13464(0.1307)#P477…
P61619	0	0	39	AVG=0.2135#O00716(0.3548)#P41143(0.1129)#Q9Y478(0.1963)#O43681(0.0431)#P46379(0.5707)#O75503(0.0391)#Q13286(0.1553)#Q14676(0.7434)#P01892(0.1041)#P04114(0.0031)#P04439(0.1425)#P30101(0.0733)#P30443(0.1973)#P30450(0.1151)#P40692(0.1812)#P51572(0.0569)#P61966(0.0823)#P62158(0.1141)#Q99608(0.3551)#Q9H492(0.1157)#P01106(0.4442)#P04626(0.1849)#P07550(0.1864)#P27824(0.353)#P13569(0.0318)#Q13418(0.0332)…
P09382	0	0	38	AVG=0.2123#Q96AE4(0.6522)#P54105(0.4262)#P57678(0.0142)#P63104(0.0776)#P78318(0.2743)#P04075(0.0357)#P21333(0.065)#P06729(0.3219)#P23527(0.3254)#O14893(0.1107)#P01730(0.0284)#P09564(0.1792)#P21399(0.0101)#P27695(0.2138)#P78347(0.2495)#Q13740(0.0652)#P11021(0.0795)#P13612(0.0165)#P30203(0.3503)#P60953(0.)#P00533(0.0851)#P02751(0.1358)#P17931(0.412)#P16150(0.78)#Q08380(0.0103)#P01106(0.4442)#P06748…
P54136	0	0	38	AVG=0.1518#Q9UQL6(0.4216)#P41250(0.0244)#O43324(0.0287)#O43776(0.0949)#P48729(0.1128)#Q13155(0.0406)#O00221(0.484)#P07814(0.1376)#P19367(0.0055)#P31689(0.1385)#P41091(0.036)#Q00653(0.2633)#Q13951(0.1978)#Q99558(0.3073)#Q9Y6K9(0.1718)#Q13616(0.0541)#Q13618(0.056)#P56192(0.0611)#Q15287(0.8361)#P61956(0.4842)#P62993(0.)#Q9NRD1(0.1229)#Q9P2J5(0.0298)#O95568(0.2151)#P00533(0.0851)#P30480(0.1381)#Q1416…
O14775	0	0	37	AVG=0.2383#P05067(0.2039)#P20073(0.3053)#P59768(0.1268)#O75822(0.5233)#Q9BTE6(0.0995)#Q15717(0.0583)#P63215(0.1467)#Q99615(0.0709)#Q14209(0.3318)#P38936(0.6341)#Q9P2W3(0.1045)#O60238(0.5799)#P67870(0.0837)#P50150(0.2133)#O60262(0.1029)#P63218(0.1912)#P49736(0.2135)#P58340(0.5224)#P53602(0.035)#O95897(0.0088)#Q15406(0.2229)#Q9Y266(0.568)#Q9UHV9(0.3831)#Q99471(0.0584)#Q13371(0.2558)#A5PKW4(0.6094)#…
P28331	0	0	37	AVG=0.1507#O00716(0.3548)#P42574(0.0758)#P42858(0.1636)#O43678(0.1717)#O60344(0.0215)#P49407(0.1818)#P50416(0.0285)#P30480(0.1381)#Q13618(0.056)#Q16795(0.0133)#Q96LI6(0.1746)#Q9NRD1(0.1229)#P06576(0.0302)#O60341(0.2406)#P0C862(0.5165)#Q14197(0.1845)#P01106(0.4442)#Q06187(0.0926)#O75306(0.0151)#O75251(0.1408)#O00217(0.)#P19404(0.1687)#P49821(0.0259)#O60313(0.)#P61020(0.1907)#P61353(0.0294)#Q9BYD1(…
Q99627	0	0	36	AVG=0.1409#Q9H9Q2(0.1894)#Q99627(0.)#Q92905(0.0269)#Q9UNS2(0.0544)#Q9NWV8(0.2736)#Q9BT78(0.032)#P55789(0.3756)#P61201(0.0858)#Q7L5N1(0.0153)#Q13098(0.11)#Q9UBW8(0.2036)#P35222(0.1793)#Q13616(0.0541)#Q13617(0.0322)#Q13618(0.056)#Q13619(0.0474)#Q13620(0.1446)#Q93034(0.0077)#Q96GG9(0.0541)#Q92466(0.0867)#Q16531(0.0035)#P35638(0.8343)#Q13216(0.0985)#Q9NRD1(0.1229)#P57775(0.0461)#P05412(0.2266)#Q96L50…
P61769	0	0	35	AVG=0.1448#P30466(0.1381)#P30491(0.1492)#P30504(0.1475)#P30685(0.1436)#P01023(0.0183)#P01891(0.1014)#P03989(0.1243)#P01889(0.1519)#P18464(0.1602)#P30443(0.1973)#P30450(0.1151)#P01892(0.1041)#P04439(0.1425)#P61769(0.)#P46379(0.5707)#P27797(0.4676)#P06126(0.)#P29016(0.)#P15813(0.0179)#P21860(0.2273)#P55899(0.0247)#P62993(0.)#Q30201(0.0172)#P13747(0.1341)#Q96GY3(0.6992)#Q6MZP7(0.0935)#Q66K74(0.4636)…
Q9NVP2	0	0	35	AVG=0.1997#Q9Y294(0.1275)#Q13112(0.3148)#Q13111(0.5669)#Q8IWY9(0.2421)#Q9Y2V0(0.0356)#P01024(0.0283)#O60496(0.3277)#P63167(0.0562)#Q92945(0.6442)#Q16695(0.3676)#P68431(0.3676)#P84243(0.3676)#P62805(0.1942)#O14929(0.)#P51610(0.255)#P54198(0.1544)#O75874(0.0193)#Q8TEX9(0.0509)#P49736(0.2135)#Q14566(0.0585)#Q6ZRQ5(0.0137)#Q16576(0.0965)#Q09028(0.12)#P62899(0.168)#P61247(0.1894)#Q9Y2R9(0.)#P78330(0.)…
Q9UBQ0	0	0	35	AVG=0.1864#P05067(0.2039)#P07602(0.0267)#O75436(0.0887)#O60749(0.2081)#O15355(0.4744)#Q6NYC1(0.2134)#P35269(0.6538)#P42224(0.0227)#Q93009(0.0762)#Q9Y266(0.568)#Q96TA1(0.2212)#Q9UNH7(0.0764)#Q9UHX1(0.127)#O75396(0.0233)#Q00341(0.0946)#P49821(0.0259)#O95155(0.2281)#Q5T6F2(0.6622)#Q9BRG1(0.)#Q9BTW9(0.0252)#Q9BVS4(0.1612)#Q15631(0.)#Q9H267(0.0194)#Q4G0F5(0.0863)#Q4G0N4(0.0882)#Q96S82(0.3816)#Q9P0T7(0…
P21283	0	0	34	AVG=0.1757#O14880(0.)#P43307(0.3252)#P50416(0.0285)#P50552(0.65)#Q8NBM4(0.0901)#P38606(0.0211)#Q13243(0.5147)#Q9BRA2(0.0407)#Q15904(0.0128)#Q16656(0.1352)#Q9HCE1(0.0469)#Q9NZ45(0.1574)#O00429(0.1481)#O60749(0.2081)#P14735(0.0049)#P15170(0.1383)#P35241(0.4048)#P37231(0.0554)#P42224(0.0227)#P52655(0.4016)#P53367(0.2601)#P62330(0.)#Q13596(0.2835)#Q14247(0.4473)#Q8IYD1(0.2946)#Q9BT73(0.041)#Q9BTT0(0.…
P30044	0	0	34	AVG=0.2829#P40925(0.)#Q06830(0.1307)#P50542(0.1111)#P30041(0.058)#P05067(0.2039)#Q14164(0.0475)#Q9GZT6(0.0197)#P32119(0.0909)#Q6MZP7(0.0935)#Q16656(0.1352)#Q99497(0.0212)#P78318(0.2743)#Q14197(0.1845)#P15336(0.5366)#Q96BK5(0.7927)#Q9NWV8(0.2736)#Q6PGN9(0.9229)#P20962(1.)#Q9H3S7(0.3606)#P54727(0.4499)#P25398(0.053)#O95486(0.29)#Q9BRT9(0.1345)#P00441(0.1429)#O60232(0.3869)#Q92783(0.213)#P63165(0.44…
Q6P1L8	0	0	34	AVG=0.2172#Q9UKY7(1.)#O43390(0.3807)#P49411(0.0199)#O95182(0.7345)#Q7KZN9(0.)#P30405(0.058)#P33316(0.3532)#Q5T653(0.118)#Q8TAE8(0.4595)#Q13618(0.056)#Q9BYD1(0.073)#Q9BYD3(0.1865)#Q16656(0.1352)#P68104(0.0736)#P01106(0.4442)#Q14197(0.1845)#Q14164(0.0475)#P23508(0.2557)#Q9NX20(0.1116)#Q9P015(0.223)#P49406(0.0925)#Q9NWU5(0.0291)#Q96DV4(0.0474)#Q9NYK5(0.0355)#Q9NQ50(0.2524)#Q96EL3(0.1518)#P60866(0.07…
Q9BVK6	0	0	34	AVG=0.1966#Q9Y265(0.0614)#Q9UHD8(0.4932)#O60551(0.2048)#O75396(0.0233)#O75533(0.2799)#P50454(0.0144)#P35659(0.5573)#Q5UIP0(0.3669)#Q8TDD1(0.4574)#Q92499(0.027)#Q92804(0.8784)#Q13228(0.0127)#Q13435(0.6615)#P04637(0.4962)#P07902(0.1478)#P17540(0.0215)#Q13190(0.0901)#Q14164(0.0475)#Q15363(0.)#Q16706(0.0245)#Q15067(0.0197)#Q15233(0.5287)#Q15437(0.0261)#Q16656(0.1352)#P61923(0.)#P19404(0.1687)#P05198(…
Q9UBX3	0	0	33	AVG=0.267#Q14457(0.1333)#Q8IX05(0.)#P07550(0.1864)#Q9C0C7(0.5408)#Q9Y478(0.1963)#Q13286(0.1553)#Q9HCK5(0.0604)#P63167(0.0562)#O00716(0.3548)#Q9H8V3(0.1444)#Q9NRD1(0.1229)#Q9UBN7(0.2568)#Q14197(0.1845)#Q13418(0.0332)#Q9BQ66(0.)#Q6PKG0(0.6487)#P43034(0.1098)#Q9Y5V3(0.4306)#Q99750(0.6179)#P01106(0.4442)#Q9GZM8(0.2377)#Q9P0J0(0.125)#Q16656(0.1352)#Q9Y2Q9(0.2032)#Q9NQC3(0.4295)#P35610(0.0782)#Q12846(0…
O43913	0	0	32	AVG=0.158#Q9UBU7(0.1766)#Q9UFC0(0.1175)#P05783(0.0163)#P33991(0.1622)#P33993(0.0348)#P42771(0.1923)#P55268(0.0573)#Q5VZB9(0.3552)#Q99459(0.303)#P49736(0.2135)#P23743(0.0367)#P25205(0.1634)#Q15233(0.5287)#Q13137(0.2018)#P33992(0.0627)#O43913(0.)#O00311(0.101)#Q99741(0.1589)#Q9Y5N6(0.2857)#O75419(0.0618)#O43929(0.0321)#Q13415(0.288)#Q9UBD5(0.0366)#Q13416(0.2686)#P15927(0.1963)#Q9P2F8(0.2642)#Q9NY15…
Q9NYG5	0	0	32	AVG=0.214#Q9UJX6(0.1144)#Q9UM13(0.1135)#O95996(0.5979)#Q9H1A4(0.0808)#Q9UJX5(0.0594)#P12830(0.1247)#Q9UMQ6(0.0528)#P14635(0.2679)#Q13042(0.0758)#Q9UJX2(0.0536)#P30260(0.2476)#Q12834(0.2585)#Q9UKT4(0.1163)#Q9UM11(0.2661)#Q9P2P5(0.3944)#P20794(0.3178)#Q8NB16(0.0276)#P30307(0.222)#Q969F2(0.9002)#Q16656(0.1352)#O95997(0.4158)#Q6ZNA4(0.6891)#Q6PJ69(0.087)#P62837(0.0408)#P51668(0.1497)#P49427(0.2458)#P…
P01116	0	5.29101	31	AVG=0.156#P50749(0.2914)#P52306(0.0082)#Q5VU43(0.24)#Q8WWW0(0.3373)#Q92633(0.1099)#Q9BQ39(0.2836)#Q15717(0.0583)#O75398(0.2124)#P05067(0.2039)#P07910(0.5882)#P42336(0.0056)#P35232(0.)#P16452(0.0362)#P28332(0.)#Q96EY1(0.0875)#P28482(0.0389)#Q12967(0.2549)#Q9GZT9(0.3638)#Q9H0S4(0.1473)#P48736(0.0426)#O00459(0.2212)#Q96ID5(0.167)#P68104(0.0736)#P04049(0.213)#P62158(0.1141)#O15211(0.3552)#O14827(0.14…
Q02809	0	0	31	AVG=0.1958#O60568(0.0217)#Q99759(0.3275)#O95166(0.0769)#Q86VP6(0.0431)#Q8TEQ6(0.1141)#Q92499(0.027)#Q92905(0.0269)#Q93034(0.0077)#Q13616(0.0541)#Q13617(0.0322)#Q13618(0.056)#Q13620(0.1446)#P60520(0.0342)#Q96GG9(0.0541)#Q9H0R8(0.0598)#Q9H492(0.1157)#Q9NRD1(0.1229)#Q9NRM7(0.4623)#Q99618(1.)#P05161(0.0606)#P16104(0.3357)#P30101(0.0733)#Q02809(0.)#Q8NCN4(0.5664)#Q9NRC8(0.205)#P61956(0.4842)#Q15554(0.…
Q03405	0	0	31	AVG=0.1468#Q9UHD9(0.4022)#P01042(0.3261)#P08631(0.1008)#P09769(0.0227)#P11215(0.0165)#P11717(0.067)#P29597(0.1019)#P35080(0.)#P61956(0.4842)#P68104(0.0736)#Q12884(0.)#Q15717(0.0583)#Q04721(0.1461)#O75347(0.1019)#O95104(0.7001)#Q13228(0.0127)#Q9BRA2(0.0407)#Q14247(0.4473)#P55809(0.0327)#Q15527(0.5156)#Q9NX18(0.0241)#P05107(0.0403)#P07602(0.0267)#P10619(0.)#P23458(0.0347)#P07948(0.1406)#Q07954(0.00…
P07858	0	0	30	AVG=0.2515#P46379(0.5707)#P07355(0.)#P02760(0.0142)#P05067(0.2039)#P20073(0.3053)#Q6UY14(0.3752)#Q07002(0.1928)#P38936(0.6341)#P01040(0.2143)#P04080(0.2755)#P01034(0.1233)#Q09019(0.4881)#Q9UNN8(0.)#Q9BPY3(0.1111)#Q9NRD1(0.1229)#Q8NE63(0.2273)#Q14103(0.3775)#O14654(0.5322)#P40692(0.1812)#Q96AZ1(0.1239)#P09874(0.0868)#P41220(0.3081)#P60903(0.1237)#Q96B97(0.597)#Q9NYA1(0.0599)#O43597(0.5175)#P0CG48(…
P31930	0	0	30	AVG=0.1549#P42858(0.1636)#P34931(0.0218)#P31689(0.1385)#P99999(0.1714)#Q99623(0.0502)#Q14103(0.3775)#Q14318(0.2621)#Q15149(0.1708)#Q16656(0.1352)#Q12906(0.5112)#P19404(0.1687)#P22695(0.0486)#P06576(0.0302)#P12235(0.)#P12236(0.0134)#Q14197(0.1845)#P15336(0.5366)#P14927(0.1441)#Q9UDW1(0.0794)#O14949(0.2317)#Q9NQC3(0.4295)#Q9Y230(0.0324)#P62306(0.2326)#Q9NRC8(0.205)#Q9Y5M8(0.0886)#Q15526(0.0433)#Q96…
P18074	0	0	29	AVG=0.2092#Q03468(0.363)#Q9HB71(0.2018)#P28715(0.4587)#Q9BTE6(0.0995)#P10275(0.3569)#P51946(0.1238)#P50613(0.0491)#P19447(0.1189)#Q9UII4(0.0312)#Q03933(0.2892)#P05161(0.0606)#P51948(0.0162)#Q6VMQ6(0.6772)#Q96T76(0.0087)#Q16656(0.1352)#Q8IVD9(0.2992)#P04637(0.4962)#Q9HB75(0.0692)#P43351(0.5048)#P31948(0.1823)#P35269(0.6538)#Q6ZYL4(0.1127)#Q13888(0.0253)#Q13889(0.0617)#Q92759(0.0303)#P32780(0.0693)…
P62745	0	0	29	AVG=0.2011#O14578(0.1426)#Q9UHA4(0.)#O43924(0.04)#O60739(0.1593)#O60831(0.0562)#Q00839(0.52)#Q6P3S6(0.4254)#P35555(0.0171)#Q8N5V2(0.3239)#Q99819(0.)#P52565(0.1961)#Q13427(0.7825)#Q13829(0.1614)#Q15717(0.0583)#Q12905(0.1641)#P06213(0.1122)#P33316(0.3532)#P51955(0.1124)#P78559(0.8323)#Q92888(0.3476)#Q9H3F6(0.1374)#Q9NR81(0.1996)#P18031(0.2138)#P22392(0.)#P16083(0.0173)#Q8IUC4(0.0539)#O43175(0.)#Q9U…
Q13643	0	0	29	AVG=0.2542#Q00587(0.7877)#Q6UY14(0.3752)#P31146(0.1692)#Q8NE01(0.1047)#Q13155(0.0406)#P16220(0.2551)#Q13643(0.)#Q9H8V3(0.1444)#P56545(0.0921)#Q14192(0.)#Q5TD97(0.)#Q13683(0.1109)#P57682(0.3652)#Q14847(0.387)#Q8TBB1(0.1648)#Q96RN5(0.4162)#Q5JR59(0.4916)#Q9P286(0.2712)#Q8IXK0(0.6364)#O60216(0.3708)#Q9BTD8(0.3062)#Q8HWS3(0.1907)#P84022(0.1671)#Q15796(0.1863)#Q13485(0.2699)#Q12772(0.1648)#P10124(0.34…
Q86XA0	0	0	29	AVG=0.1124#Q07817(0.2146)#O60884(0.2112)#P01040(0.2143)#P04183(0.0684)#P11021(0.0795)#P14625(0.1382)#P31689(0.1385)#P31944(0.0702)#P46379(0.5707)#Q14697(0.0636)#Q86XA0(0.)#Q8N163(0.3402)#Q9UBS4(0.0726)#Q9H867(0.0524)#Q15084(0.1364)#P31151(0.2277)#P06702(0.2281)#O60613(0.)#P50454(0.0144)#Q13885(0.0652)#P04350(0.0631)#Q13509(0.0711)#Q9BUF5(0.0628)#P49368(0.0789)#P0CG47(0.)#P0CG48(0.)#P11441(0.051)#…
Q92624	0	0	29	AVG=0.1483#P42568(0.6514)#P05067(0.2039)#Q9NZZ3(0.5479)#P26992(0.1102)#O43889(0.0684)#Q7L5N1(0.0153)#Q13617(0.0322)#Q8N140(0.0661)#Q15370(0.3051)#Q15369(0.1071)#A1XBS5(0.1696)#Q12841(0.0974)#P14770(0.)#Q6ZMV9(0.1413)#Q96ES6(0.0243)#Q969V5(0.0142)#P23511(0.17)#Q92824(0.0145)#A4QPH2(0.0287)#Q8WWW0(0.3373)#Q15050(0.5041)#Q4U2R8(0.0817)#Q8WVM8(0.0421)#Q9BT88(0.1833)#Q12788(0.0173)#P0CG48(0.)#Q96S15(0…
P12235	0	0	27	AVG=0.1667#Q9BXK5(0.3237)#Q07812(0.1562)#P24941(0.0336)#Q13286(0.1553)#O75503(0.0391)#Q92905(0.0269)#O00716(0.3548)#Q10471(0.0771)#P62993(0.)#Q14197(0.1845)#P25963(0.2555)#Q02156(0.1289)#Q5S007(0.0123)#P16455(0.087)#P30405(0.058)#O60260(0.0989)#P31930(0.)#Q96L21(0.0187)#P15880(0.2253)#P61247(0.1894)#P08865(0.2847)#Q6EEV6(0.5368)#P15923(0.7339)#P20333(0.4447)#P0CG48(0.)#O15205(0.0242)#P11441(0.051)
P24666	0	0	27	AVG=0.1355#O60739(0.1593)#Q5T0N5(0.2942)#P35222(0.1793)#Q92905(0.0269)#Q14164(0.0475)#Q16656(0.1352)#Q99728(0.2239)#P02751(0.1358)#P04150(0.1995)#P11171(0.419)#P24941(0.0336)#P29317(0.0154)#P29323(0.0682)#P13612(0.0165)#P54762(0.0081)#P24666(0.)#P56537(0.0286)#Q13177(0.313)#P30050(0.103)#Q9BYC9(0.)#Q9UHJ3(0.1871)#Q9UKE5(0.4846)#P0CG48(0.)#P19320(0.0108)#P35968(0.0811)#P40337(0.3709)#P43403(0.1179)
P40938	0	0	27	AVG=0.2882#P12004(0.0192)#Q8N6T3(0.4631)#Q8WVB6(0.3118)#Q9Y5J5(0.0787)#Q9Y2M0(0.1357)#O60216(0.3708)#Q00577(0.3696)#P51858(0.7583)#Q7L2J0(0.5486)#P35250(0.0876)#Q99459(0.303)#Q16658(0.0426)#Q96QR8(0.3654)#Q9NRD1(0.1229)#P25205(0.1634)#Q14696(0.4957)#P35251(0.439)#O60885(0.8172)#P01106(0.4442)#O75943(0.2041)#P35249(0.0826)#O75818(0.0165)#Q9H4L7(0.23)#Q13573(0.5504)#P55072(0.1079)#P0CG48(0.)#Q9Y2K6…
P62380	0	0	27	AVG=0.2184#F7VJQ1(0.4247)#Q15126(0.0208)#Q15286(0.0448)#Q15717(0.0583)#O00268(0.5926)#O60664(0.1175)#P04156(0.3478)#P05067(0.2039)#P21675(0.3301)#P27635(0.0374)#P38646(0.0898)#P49848(0.3648)#Q15542(0.27)#Q6SJ96(0.424)#Q8IZX4(0.2464)#Q8N357(0.0539)#Q96EY7(0.0726)#Q9NUQ8(0.0691)#Q9NWZ3(0.0696)#P52657(0.0917)#P56556(0.0714)#P20226(0.4897)#Q15554(0.5148)#P54274(0.3781)#P52655(0.4016)#Q00403(0.1108)#P…
P08559	0	0	26	AVG=0.1677#O14979(0.4667)#Q9Y478(0.1963)#Q02218(0.0137)#Q9BSB4(0.)#Q13618(0.056)#P56537(0.0286)#P78347(0.2495)#P07550(0.1864)#P41236(0.9073)#P52429(0.0476)#Q13352(0.339)#P10515(0.1886)#P13612(0.0165)#Q9NWV8(0.2736)#P11177(0.0139)#O00330(0.2595)#Q15118(0.0459)#Q9P0J1(0.0242)#P31040(0.0286)#Q9NRC8(0.205)#Q9BRT9(0.1345)#Q99594(0.131)#P0CG48(0.)#O94966(0.2974)#P19320(0.0108)#Q8TBZ3(0.2408)
Q8IXI1	0	1.61812	26	AVG=0.1736#O00716(0.3548)#P38919(0.0389)#Q9UKV3(0.8523)#O43390(0.3807)#Q08211(0.1008)#Q8N4Q1(0.4437)#P52597(0.041)#Q9NRD1(0.1229)#P13639(0.0047)#Q13418(0.0332)#O75251(0.1408)#O00217(0.)#Q15070(0.108)#P15735(0.0222)#O60260(0.0989)#P20339(0.214)#P32969(0.0625)#P62854(0.4435)#P15880(0.2253)#P34925(0.0596)#Q9Y512(0.0512)#Q13243(0.5147)#Q9NZ01(0.)#P0CG48(0.)#O15205(0.0242)#O95405(0.1761)
O00217	0	0	25	AVG=0.0842#P40692(0.1812)#O43678(0.1717)#P39210(0.)#O75380(0.)#O75489(0.0947)#Q7KZN9(0.)#Q8IXI1(0.)#P38646(0.0898)#Q92887(0.0485)#Q9BU61(0.0489)#P28331(0.)#Q14197(0.1845)#P55040(0.2196)#P19404(0.1687)#P49821(0.0259)#Q16656(0.1352)#O60313(0.)#P49768(0.2827)#Q02127(0.0481)#P61020(0.1907)#P05388(0.0915)#Q9Y512(0.0512)#P31040(0.0286)#Q15526(0.0433)#P0CG48(0.)
O60313	0	0	25	AVG=0.1262#O43464(0.0917)#P01106(0.4442)#P05067(0.2039)#P43354(0.2375)#Q5S007(0.0123)#O00115(0.0528)#O00217(0.)#Q86VP6(0.0431)#Q13618(0.056)#P55084(0.)#Q15717(0.0583)#Q15818(0.2014)#Q16656(0.1352)#Q16795(0.0133)#Q12906(0.5112)#Q13011(0.0427)#Q9NQR4(0.)#P28331(0.)#Q12983(0.5309)#P08473(0.0227)#O60260(0.0989)#P84022(0.1671)#Q15796(0.1863)#O75365(0.0462)#P0CG48(0.)
P07339	0	0	25	AVG=0.1202#P05067(0.2039)#P50750(0.0941)#Q13617(0.0322)#Q93034(0.0077)#P49917(0.0187)#Q9NRD1(0.1229)#Q9H0R8(0.0598)#P14672(0.0668)#P16104(0.3357)#P69905(0.0493)#Q86YJ5(0.4046)#P28482(0.0389)#Q16656(0.1352)#P10619(0.)#Q02833(0.4692)#O75901(0.1908)#A6NK89(0.4379)#P07602(0.0267)#P04278(0.0871)#P0CG48(0.)#Q9Y5K5(0.1094)#P38606(0.0211)#P15313(0.037)#P19320(0.0108)#Q93050(0.0454)
P0DI81	0	0	25	AVG=0.1283#Q7Z392(0.0088)#Q8N0Z2(0.5381)#Q8TAC2(0.1064)#Q15717(0.0583)#Q99613(0.2738)#O15247(0.0688)#P06733(0.0161)#Q96D71(0.6495)#P11217(0.0226)#P13747(0.1341)#P13929(0.0161)#O00299(0.0622)#Q8WVT3(0.3497)#Q96QF0(0.1218)#P48553(0.058)#Q5T215(0.0829)#O75865(0.0252)#Q86SZ2(0.)#Q9Y296(0.0228)#Q9Y2L5(0.0829)#O43617(0.0944)#Q8IUR0(0.0638)#Q96Q05(0.0462)#P0CG48(0.)#Q8NAP3(0.3046)
P16035	0	0	25	AVG=0.1991#Q9Y266(0.568)#O76070(0.2756)#P50281(0.1014)#O00264(0.2872)#P60900(0.0244)#O95757(0.1478)#P14780(0.1089)#O95817(0.8609)#O95996(0.5979)#P22234(0.0094)#O14818(0.0927)#P03956(0.0896)#P08254(0.0608)#P51512(0.1137)#P51511(0.1973)#Q14697(0.0636)#P43487(0.4129)#P30084(0.0172)#P20336(0.1636)#P47914(0.6792)#P22061(0.0529)#P55786(0.0065)#P61289(0.0236)#Q9Y617(0.0162)#P08253(0.0061)
P27487	0	0	25	AVG=0.1673#O00626(0.)#O14625(0.0532)#P51671(0.134)#Q9BXL7(0.2166)#P16860(0.4776)#O95999(0.3433)#P00813(0.0413)#P13501(0.044)#P19875(0.1121)#Q07325(0.272)#P02778(0.1327)#O94907(0.0338)#P27487(0.)#Q9BSJ2(0.0377)#P09681(0.2418)#P01275(0.1889)#O14920(0.0966)#P01303(0.3814)#P18509(0.2841)#P08575(0.2416)#P10082(0.4639)#P48061(0.)#P01286(0.213)#P20366(0.062)#P01282(0.1118)
P60763	0	0	25	AVG=0.3373#Q9UHY1(0.1981)#Q99828(0.0366)#P07195(0.015)#P07197(0.5066)#P19338(0.5944)#P20823(0.4865)#P55209(0.3146)#Q7L014(0.2997)#Q92793(0.6274)#Q9P013(0.7948)#Q9HB71(0.2018)#O95758(0.1304)#P03372(0.1681)#P52566(0.199)#P52565(0.1961)#P10276(0.2229)#Q96IZ5(0.1356)#Q96IZ7(0.8683)#Q9H446(0.4239)#P19793(0.3009)#Q04206(0.3194)#P0CG48(0.)#P98170(0.0584)#P31629(0.5581)#Q9Y5V0(0.7763)
Q9NZ01	0	0	25	AVG=0.1433#O00716(0.3548)#O43889(0.0684)#Q6ZW49(0.2984)#Q86VP6(0.0431)#Q8IXI1(0.)#Q13286(0.1553)#Q9BW60(0.0287)#Q13618(0.056)#Q13724(0.0621)#Q96G23(0.1132)#Q16656(0.1352)#Q9H492(0.1157)#Q9P2P5(0.3944)#P04843(0.0099)#P00533(0.0851)#P15924(0.063)#P29474(0.1421)#Q13418(0.0332)#Q9NR20(0.275)#P31152(0.2521)#P03372(0.1681)#Q9Y463(0.4515)#Q8NE63(0.2273)#P0CG48(0.)#P11441(0.051)
